# Supplementary material
Source: Royal Society of Chemistry journal article supplement (doi:10.1039/d6ob00250a)
Supplement: d6ob00250a1.pdf [file d6ob00250a1.pdf]

*Supporting information*

**Configurational stability of bis-*ortho*-methyl Tröger's base: The methylene bridge substitution with retention of stereochemistry**

Sundaram Suresh\*

*School of Chemistry, University of Hyderabad, Central University P.O.*

*Hyderabad-500046, India*

*ssureshuoh@gmail.com*

Table of Contents:

|                                                          |         |
|----------------------------------------------------------|---------|
| 1. Copies of HPLC profiles                               | S2-S9   |
| 2. <sup>1</sup> H and <sup>13</sup> C NMR Spectra copies | S10-S31 |
| 3. Single crystal analytical data                        | S32-S34 |

# 1. Copies of HPLC profiles

**HPLC Profile of (±)-2d:** chiral column Chiralcel OJ-H, EtOH; flow rate 0.5 mL/min

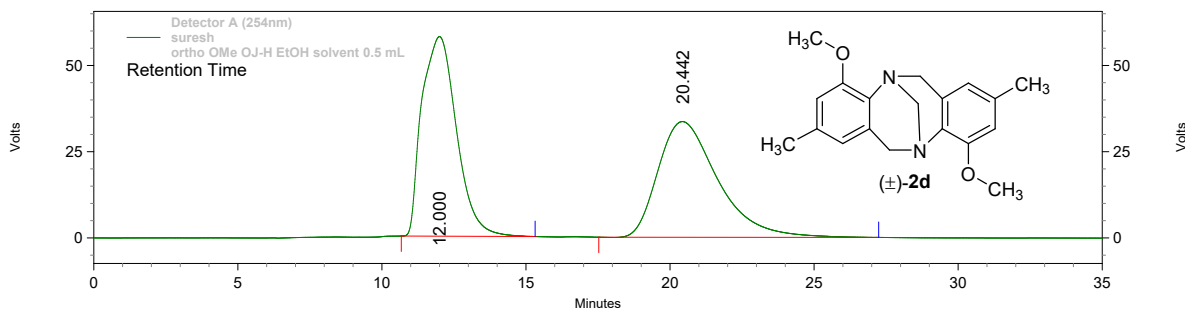

## Detector A (254nm)

| Pk # | Retention Time | Area    | Area % | Height | Height % |
|------|----------------|---------|--------|--------|----------|
| 1    | 12.000         | 4828779 | 50.003 | 57869  | 63.297   |
| 2    | 20.442         | 4828171 | 49.997 | 33555  | 36.703   |

| Totals |  | 9656950 | 100.000 | 91424 | 100.000 |
|--------|--|---------|---------|-------|---------|
|--------|--|---------|---------|-------|---------|

**HPLC Profile of (+)-2d:** chiral column Chiralcel OJ-H, EtOH; flow rate 0.5 mL/min

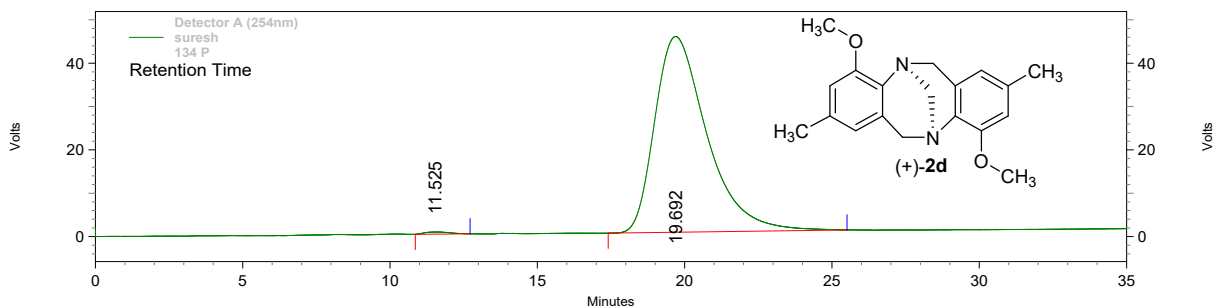

## Detector A (254nm)

| Pk # | Retention Time | Area    | Area % | Height | Height % |
|------|----------------|---------|--------|--------|----------|
| 1    | 11.525         | 28894   | 0.517  | 485    | 1.062    |
| 2    | 19.692         | 5557610 | 99.483 | 45165  | 98.938   |

| Totals |  | 5586504 | 100.000 | 45650 | 100.000 |
|--------|--|---------|---------|-------|---------|
|--------|--|---------|---------|-------|---------|

**HPLC Profile of (-)-2d:** chiral column Chiralcel OJ-H, EtOH; flow rate 0.5 mL/min

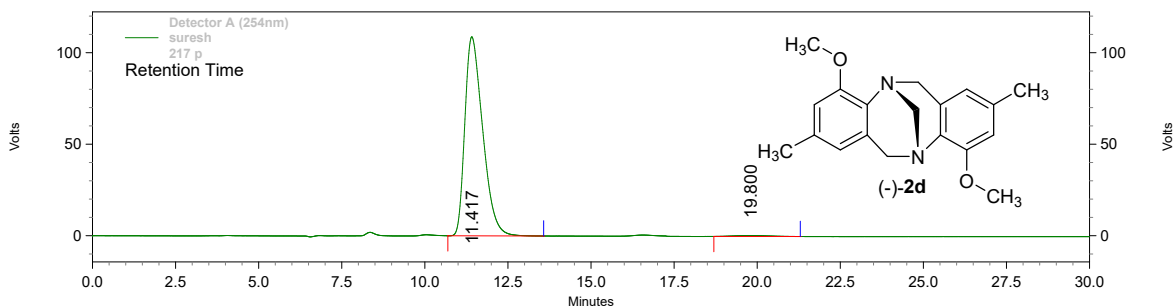

**Detector A (254nm)**

| Pk # | Retention Time | Area    | Area % | Height | Height % |
|------|----------------|---------|--------|--------|----------|
| 1    | 11.417         | 4060149 | 99.160 | 108718 | 99.548   |
| 2    | 19.800         | 34399   | 0.840  | 494    | 0.452    |

|        |  |         |         |        |         |
|--------|--|---------|---------|--------|---------|
| Totals |  | 4094548 | 100.000 | 109212 | 100.000 |
|--------|--|---------|---------|--------|---------|

**HPLC Profile of (±)-6aa:** chiral column Chiralcel OD-H, hexanes:i-PrOH/99.5:0.5; flow rate 0.8 mL/min

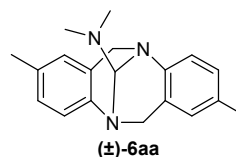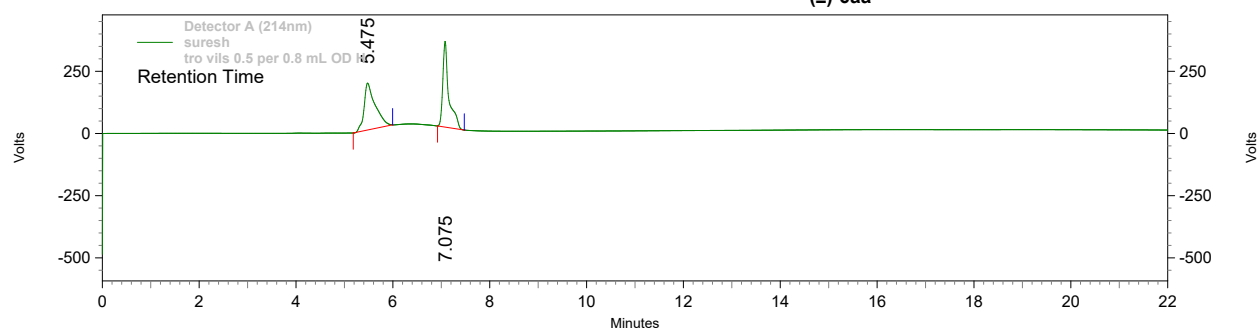

**Detector A (214nm)**

| Pk # | Retention Time | Area    | Area % | Height | Height % |
|------|----------------|---------|--------|--------|----------|
| 1    | 5.475          | 3005344 | 50.070 | 188510 | 35.387   |
| 2    | 7.075          | 2996998 | 49.930 | 344193 | 64.613   |

|       |  |         |         |        |         |
|-------|--|---------|---------|--------|---------|
| Total |  | 6002342 | 100.000 | 532703 | 100.000 |
|-------|--|---------|---------|--------|---------|

**HPLC Profile of (±)-6ba:** chiral column Chiralcel OD-H, hexanes:i-PrOH/90:10; flow rate 0.7 mL/min

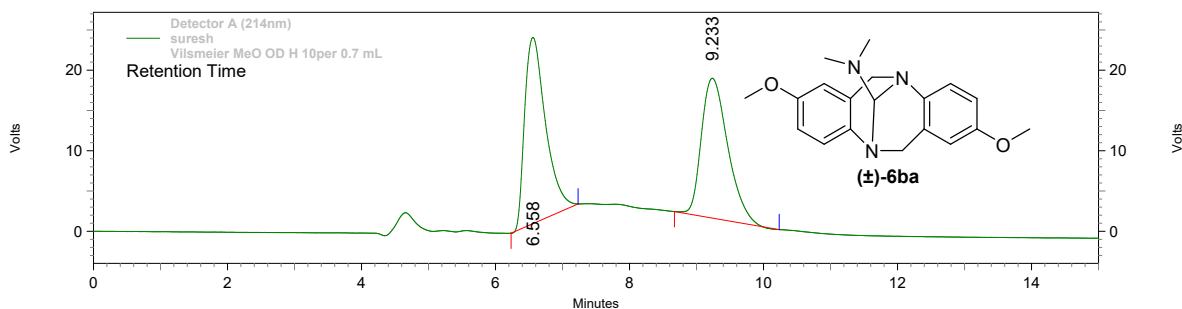

**Detector A (214nm)**

| Pk # | Retention Time | Area   | Area % | Height | Height % |
|------|----------------|--------|--------|--------|----------|
| 1    | 6.558          | 501812 | 51.329 | 23127  | 57.133   |
| 2    | 9.233          | 475821 | 48.671 | 17352  | 42.867   |

|       |  |        |         |       |         |
|-------|--|--------|---------|-------|---------|
| Total |  | 977633 | 100.000 | 40479 | 100.000 |
|-------|--|--------|---------|-------|---------|

**HPLC Profile of (±)-7bb:** chiral column Chiralcel phenomenex cellulose-1, hexanes:i-PrOH/98:2; flow rate 1.2 mL/min

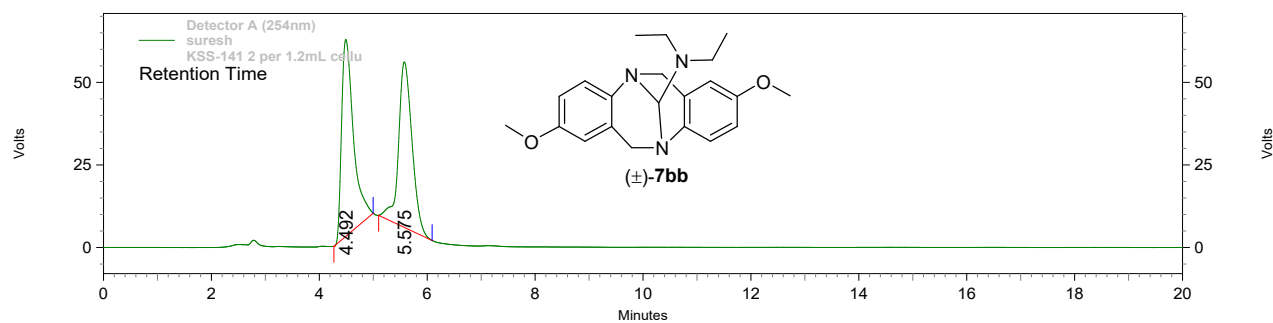

**Detector A (254nm)**

| Pk # | Retention Time | Area   | Area % | Height | Height % |
|------|----------------|--------|--------|--------|----------|
| 1    | 4.492          | 910303 | 51.042 | 59596  | 54.313   |
| 2    | 5.575          | 873144 | 48.958 | 50131  | 45.687   |

|       |  |         |         |        |         |
|-------|--|---------|---------|--------|---------|
| Total |  | 1783447 | 100.000 | 109727 | 100.000 |
|-------|--|---------|---------|--------|---------|

**HPLC Profile of (±)-8da:** chiral column Chiralcel AD-H, hexanes:EtOH/99.5:0.5; flow rate 0.8 mL/min

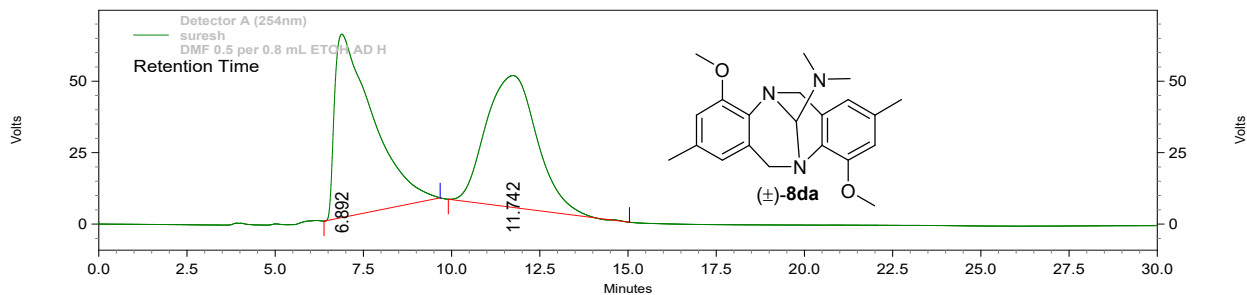

**Detector A (254nm)**

| Pk #         | Retention Time | Area           | Area %         | Height        | Height %       |
|--------------|----------------|----------------|----------------|---------------|----------------|
| 1            | 6.892          | 4819146        | 50.908         | 64144         | 58.149         |
| 2            | 11.742         | 4647204        | 49.092         | 46165         | 41.851         |
| <b>Total</b> |                | <b>9466350</b> | <b>100.000</b> | <b>110309</b> | <b>100.000</b> |

**HPLC Profile of 8da:** chiral column Chiralcel AD-H hexanes:EtOH/99.5:0.5; flow rate 0.8 mL/min

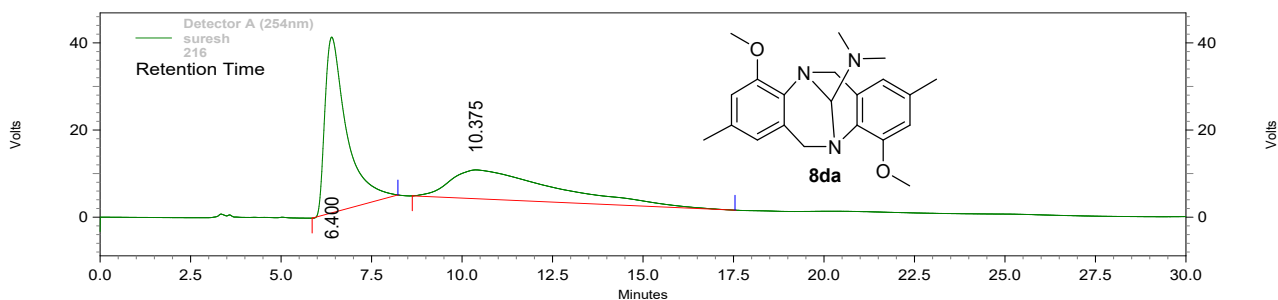

**Detector A (254nm)**

| Pk #         | Retention Time | Area           | Area %         | Height       | Height %       |
|--------------|----------------|----------------|----------------|--------------|----------------|
| 1            | 6.400          | 1677063        | 55.170         | 40317        | 85.922         |
| 2            | 10.375         | 1362728        | 44.830         | 6606         | 14.078         |
| <b>Total</b> |                | <b>3039791</b> | <b>100.000</b> | <b>46923</b> | <b>100.000</b> |

**HPLC Profile of (±)-8ea:** chiral column Chiralcel phenomenex cellulose-1, hexanes:i-PrOH/99.5:0.5; flow rate 0.3 mL/min

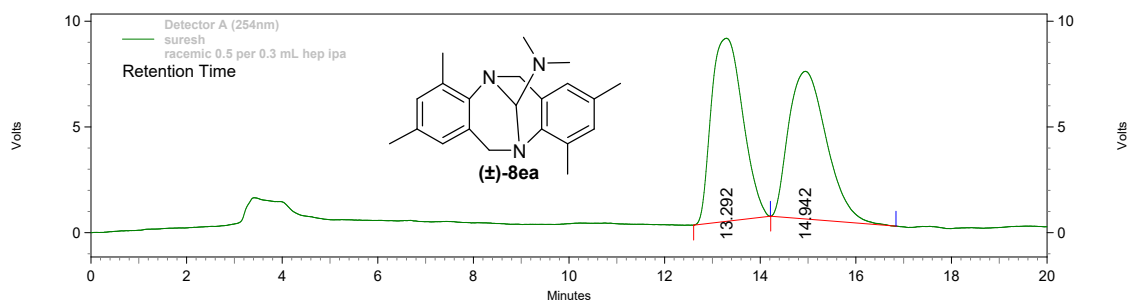

**Detector A (254nm)**

| Pk #         | Retention Time | Area   | Area %  | Height | Height % |
|--------------|----------------|--------|---------|--------|----------|
| 1            | 13.292         | 395629 | 50.663  | 8658   | 55.358   |
| 2            | 14.942         | 385273 | 49.337  | 6982   | 44.642   |
| <b>Total</b> |                | 780902 | 100.000 | 15640  | 100.000  |

**HPLC Profile of (+)-8ea:** chiral column Chiralcel phenomenex cellulose-1, hexanes:i-PrOH/99.5:0.5; flow rate 0.3 mL/min

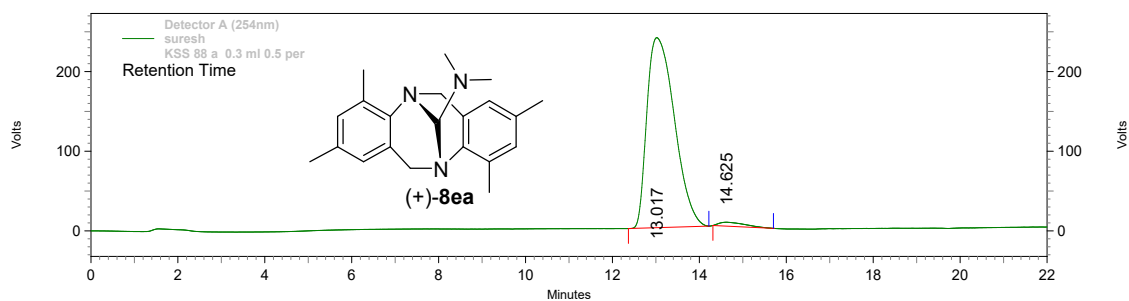

**Detector A (254nm)**

| Pk #         | Retention Time | Area     | Area %  | Height | Height % |
|--------------|----------------|----------|---------|--------|----------|
| 1            | 13.017         | 10514135 | 98.021  | 238563 | 97.966   |
| 2            | 14.625         | 212297   | 1.979   | 4952   | 2.034    |
| <b>Total</b> |                | 10726432 | 100.000 | 243515 | 100.000  |

**HPLC Profile of (-)-8ea:** chiral column Chiralcel phenomenex cellulose-1, hexanes:i-PrOH/99.5:0.5; flow rate 0.3 mL/min

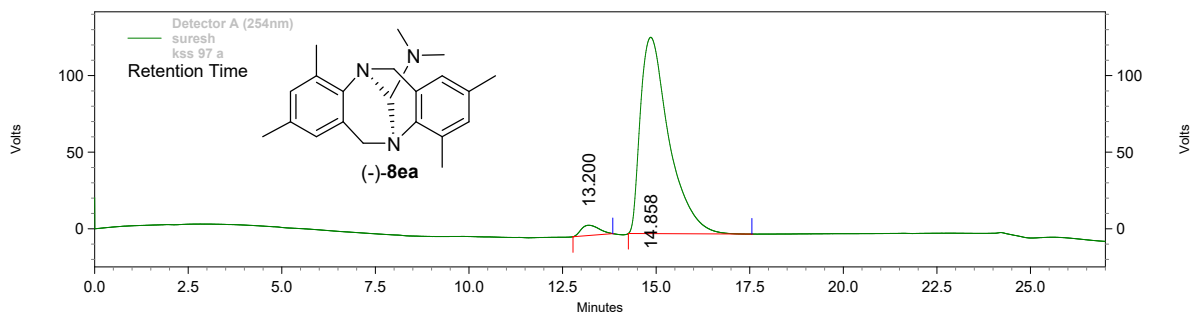

**Detector A (254nm)**

| Pk # | Retention Time | Area    | Area % | Height | Height % |
|------|----------------|---------|--------|--------|----------|
| 1    | 13.200         | 222250  | 3.167  | 6677   | 4.952    |
| 2    | 14.858         | 6795584 | 96.833 | 128165 | 95.048   |

|       |  |         |         |        |         |
|-------|--|---------|---------|--------|---------|
| Total |  | 7017834 | 100.000 | 134842 | 100.000 |
|-------|--|---------|---------|--------|---------|

**HPLC Profile of (±)-9eb:** chiral column Chiralcel phenomenex cellulose-1, hexanes:i-PrOH/99.9:0.1; flow rate 1.2 mL/min

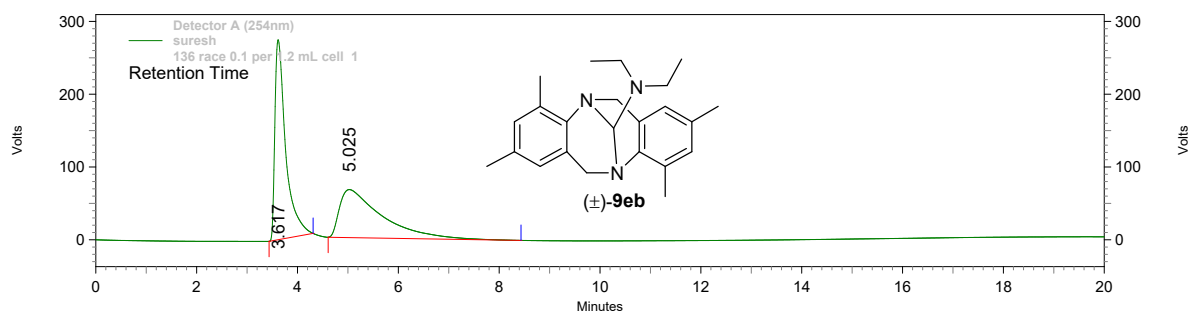

**Detector A (254nm)**

| Pk # | Retention Time | Area    | Area % | Height | Height % |
|------|----------------|---------|--------|--------|----------|
| 1    | 3.617          | 4086581 | 51.506 | 274704 | 80.629   |
| 2    | 5.025          | 3847551 | 48.494 | 65998  | 19.371   |

|       |  |         |         |        |         |
|-------|--|---------|---------|--------|---------|
| Total |  | 7934132 | 100.000 | 340702 | 100.000 |
|-------|--|---------|---------|--------|---------|

**HPLC Profile of (+)-9eb:** chiral column Chiralcel phenomenex cellulose-1, hexanes:i-PrOH/99.9:0.1; flow rate 1.2 mL/min

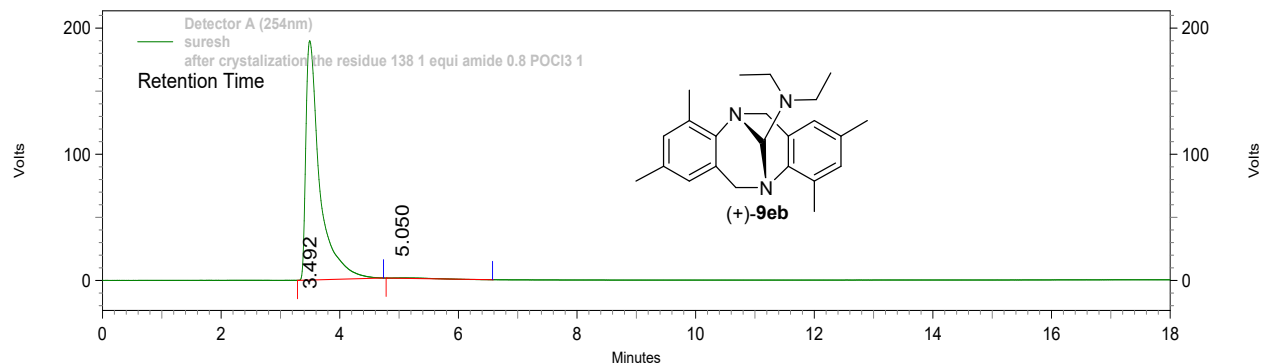

**Detector A (254nm)**

| Pk # | Retention Time | Area    | Area % | Height | Height % |
|------|----------------|---------|--------|--------|----------|
| 1    | 3.492          | 3082453 | 99.635 | 189631 | 99.845   |
| 2    | 5.050          | 11286   | 0.365  | 294    | 0.155    |

|       |  |         |         |        |         |
|-------|--|---------|---------|--------|---------|
| Total |  | 3093739 | 100.000 | 189925 | 100.000 |
|-------|--|---------|---------|--------|---------|

**HPLC Profile of (±)-8fa:** chiral column Chiralcel phenomenex cellulose-1, hexanes:i-PrOH/99.8:0.2; flow rate 1.0 mL/min

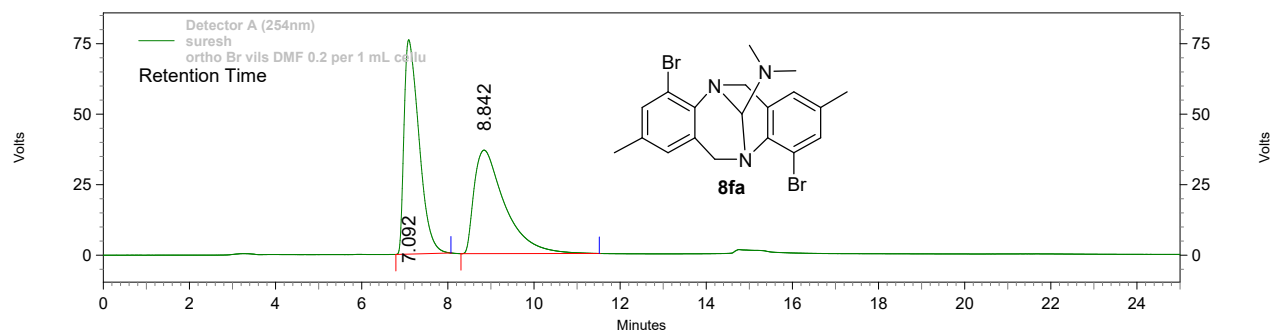

**Detector A (254nm)**

| Pk # | Retention Time | Area    | Area % | Height | Height % |
|------|----------------|---------|--------|--------|----------|
| 1    | 7.092          | 1837338 | 50.287 | 76026  | 67.434   |
| 2    | 8.842          | 1816368 | 49.713 | 36715  | 32.566   |

|       |  |         |         |        |         |
|-------|--|---------|---------|--------|---------|
| Total |  | 3653706 | 100.000 | 112741 | 100.000 |
|-------|--|---------|---------|--------|---------|

**HPLC Profile of 8fa:** chiral column Chiralcel phenomenonex cellulose-1, hexanes:i-PrOH/99.8:0.2;  
flow rate 1.0 mL/min

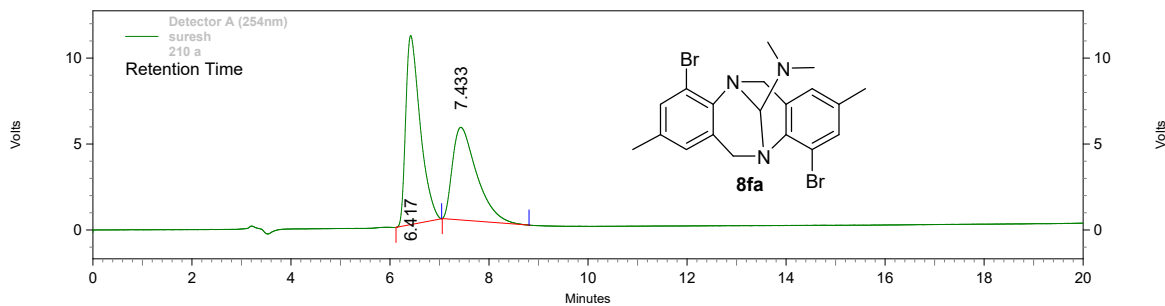

**Detector A (254nm)**

| Pk # | Retention Time | Area   | Area % | Height | Height % |
|------|----------------|--------|--------|--------|----------|
| 1    | 6.417          | 223873 | 54.918 | 11003  | 67.120   |
| 2    | 7.433          | 183775 | 45.082 | 5390   | 32.880   |

|       |  |        |         |       |         |
|-------|--|--------|---------|-------|---------|
| Total |  | 407648 | 100.000 | 16393 | 100.000 |
|-------|--|--------|---------|-------|---------|

## 2. NMR Spectra Copies

$^1\text{H}$  NMR spectrum of compound **2c**

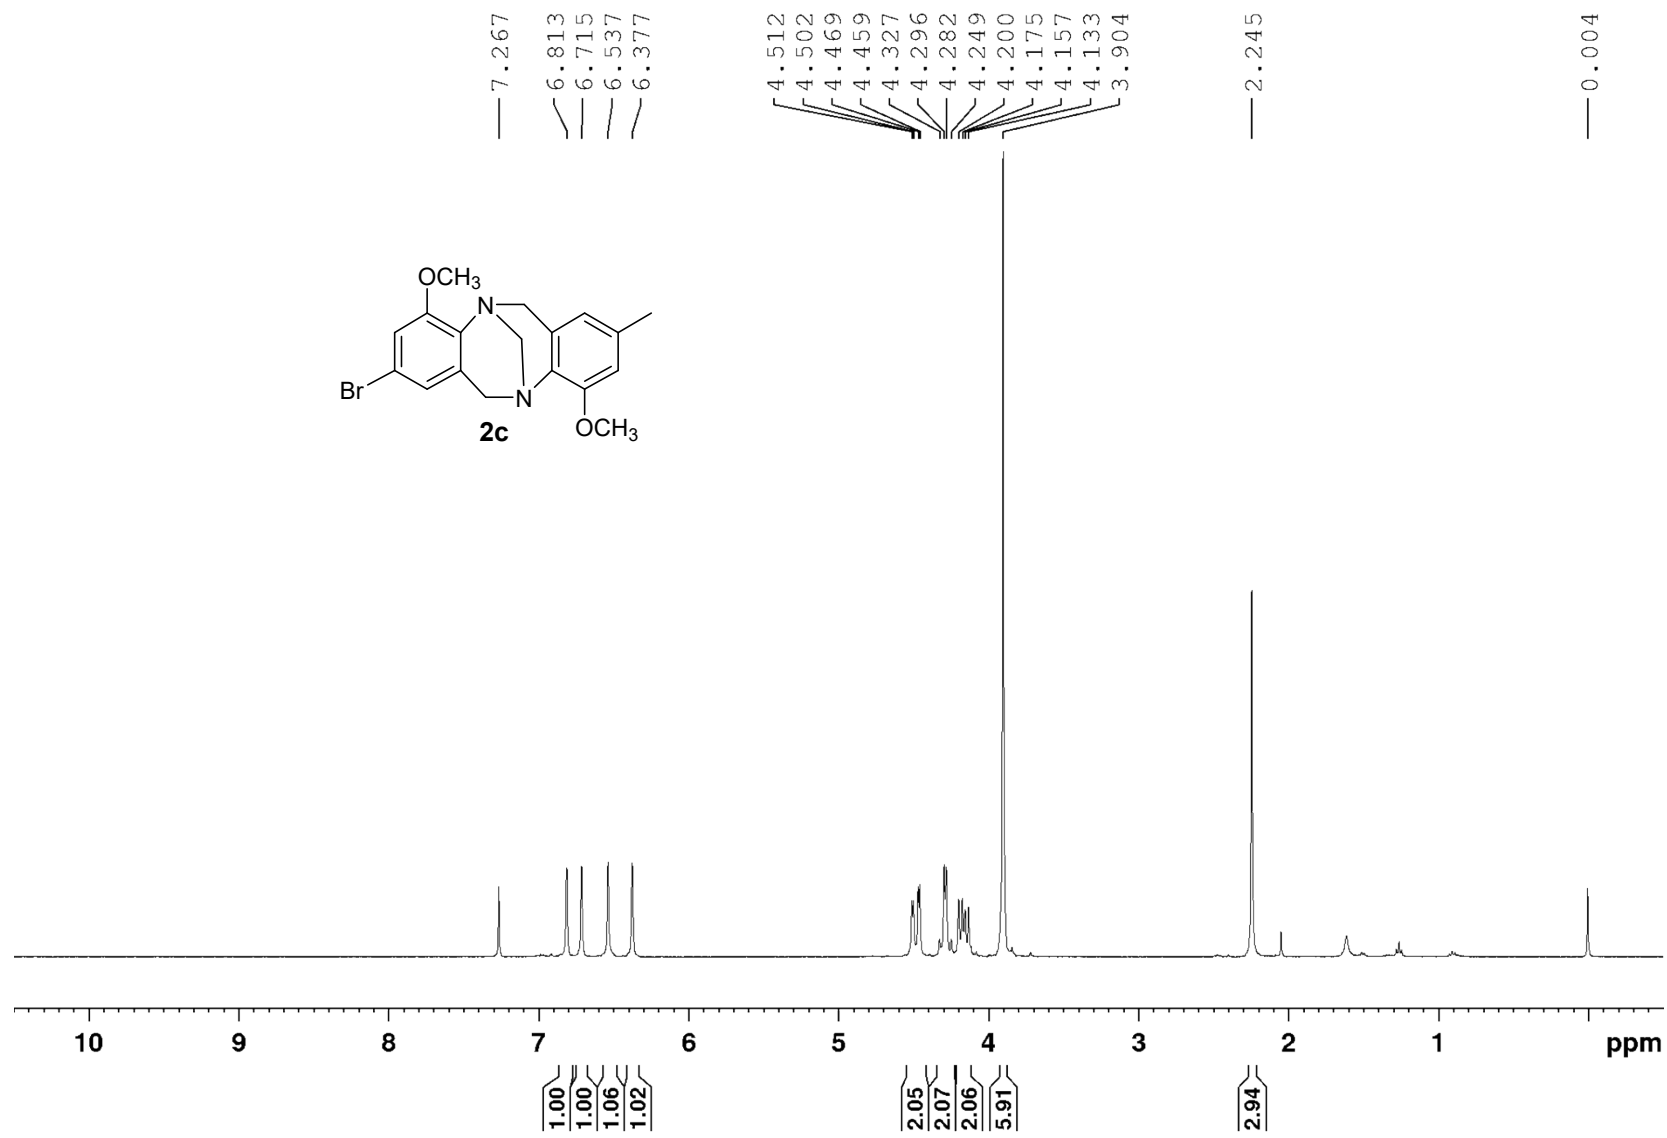

<sup>13</sup>C NMR spectrum of compound **2c**

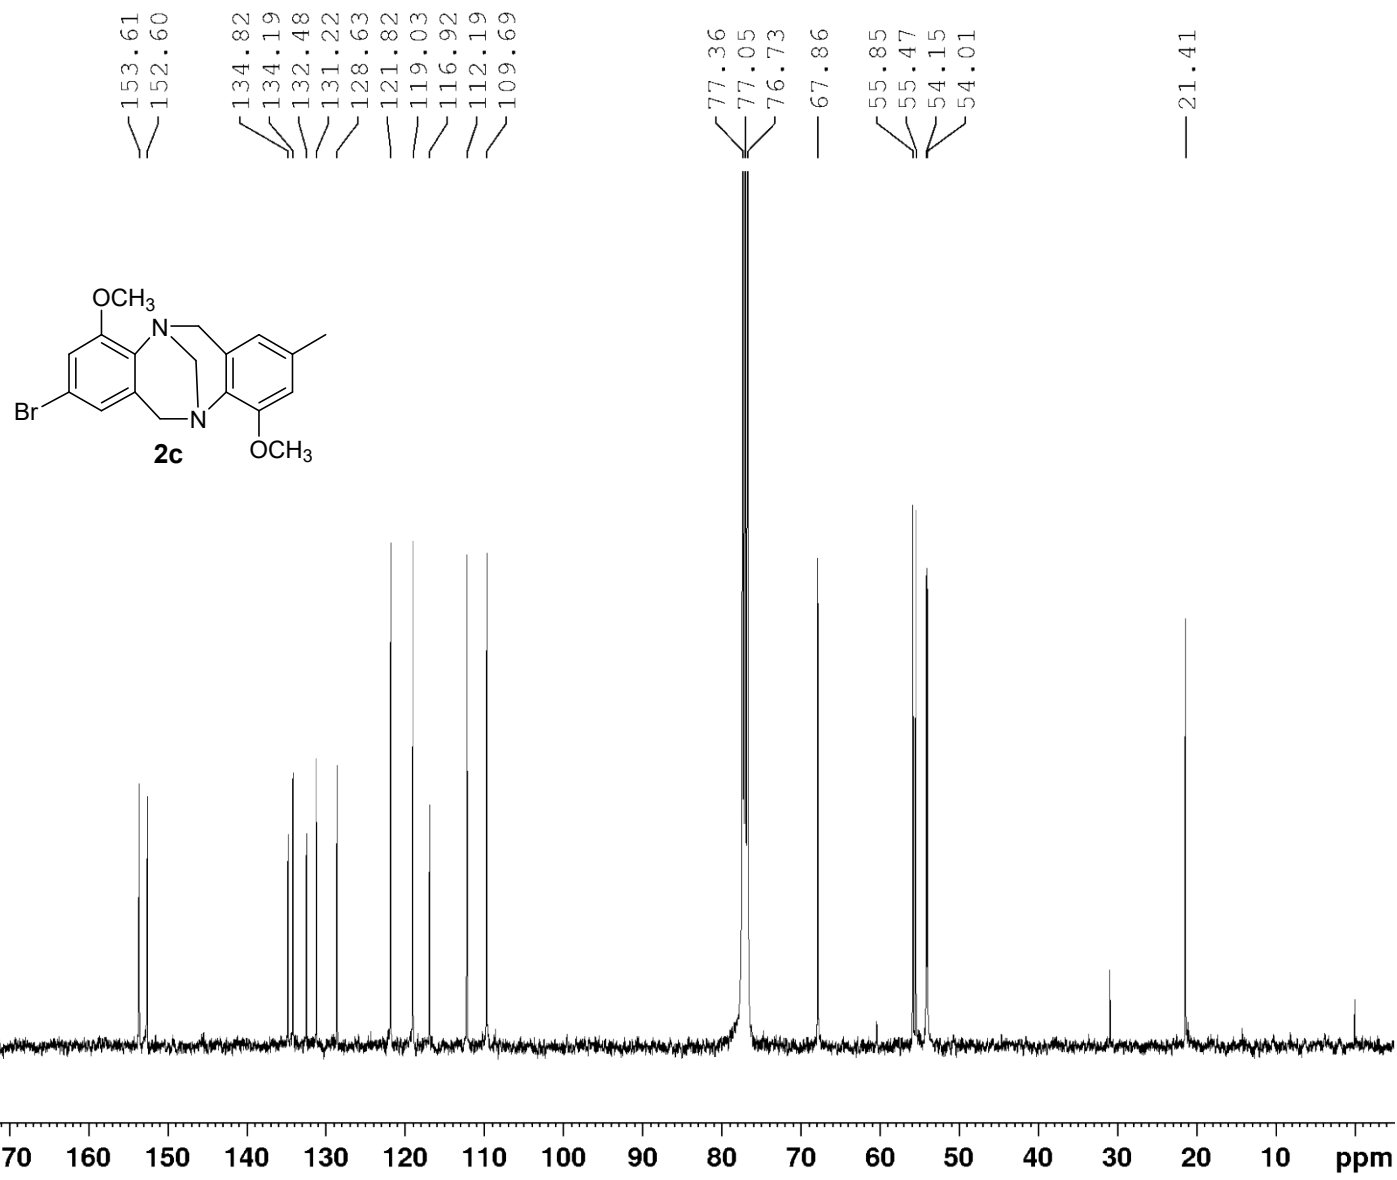

<sup>1</sup>H NMR spectrum of compound **2d**

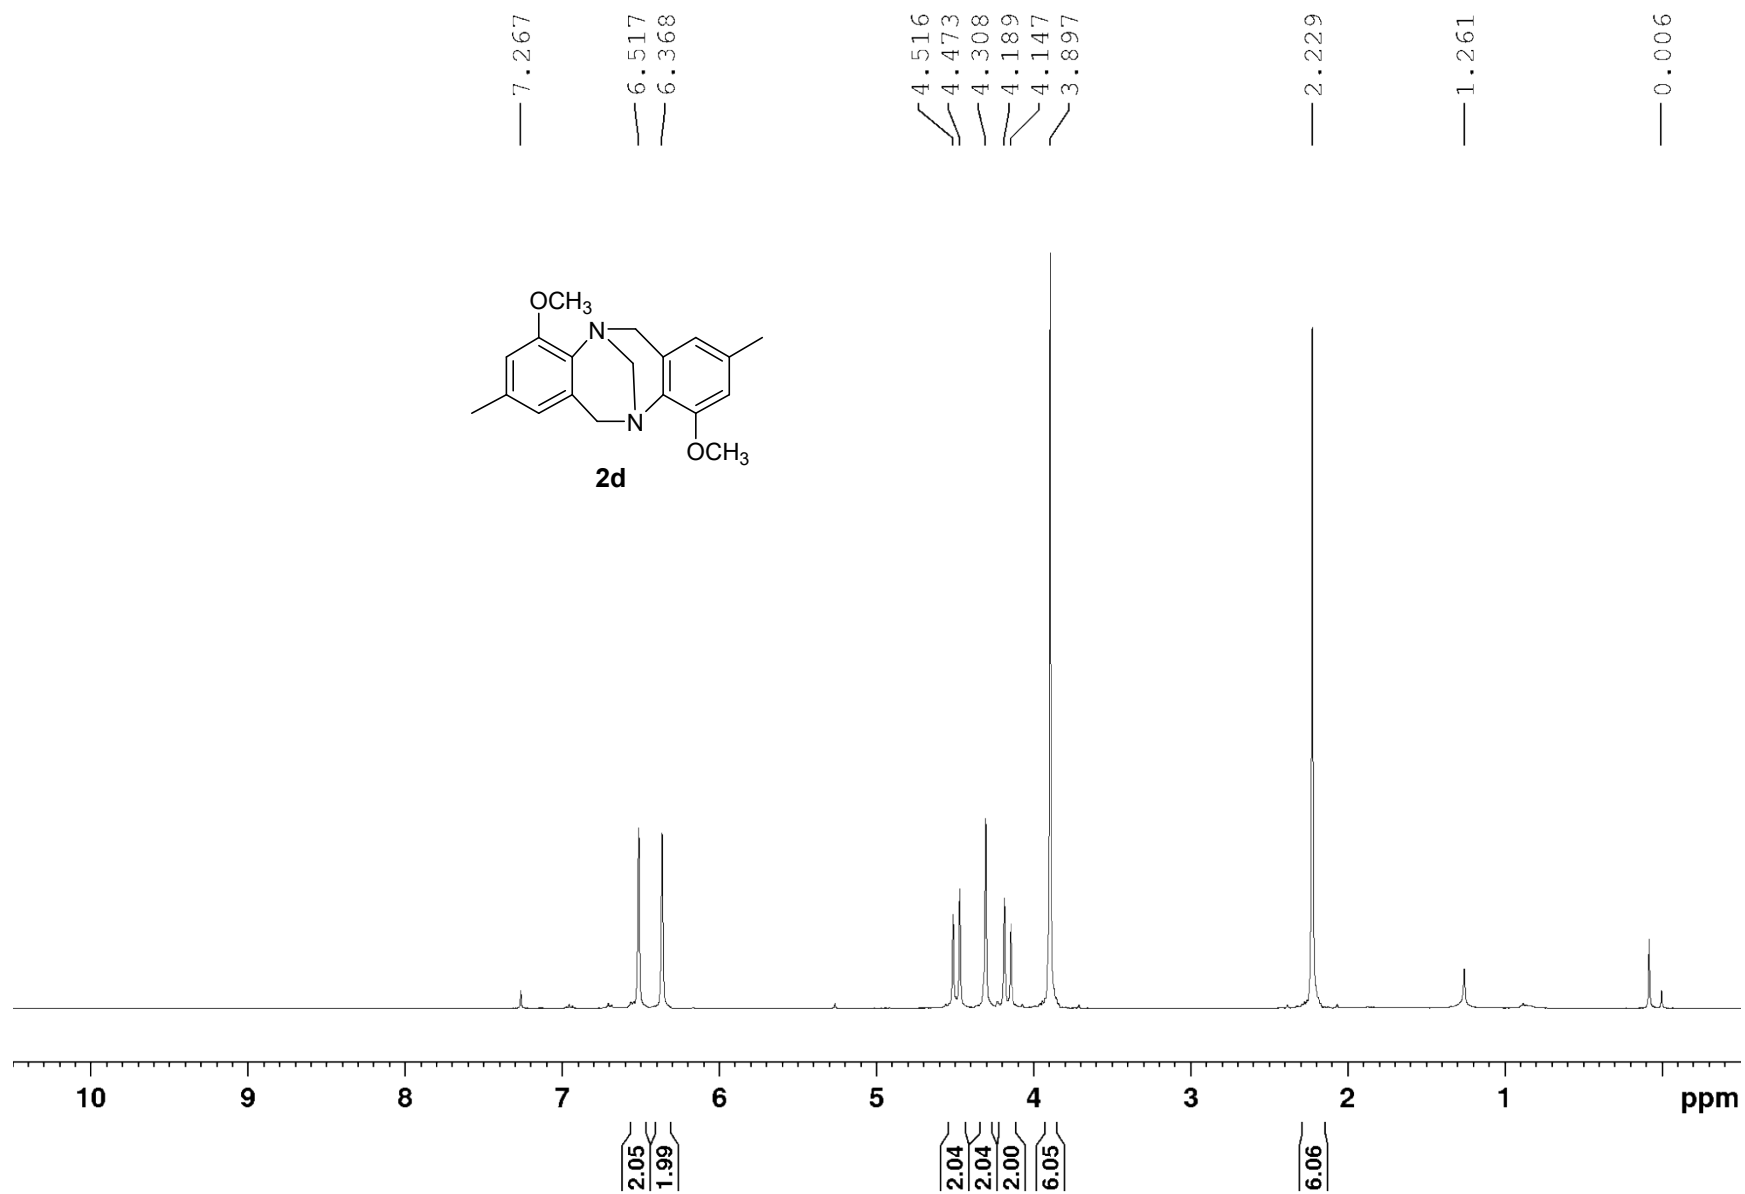

<sup>13</sup>C NMR spectrum of compound **2d**

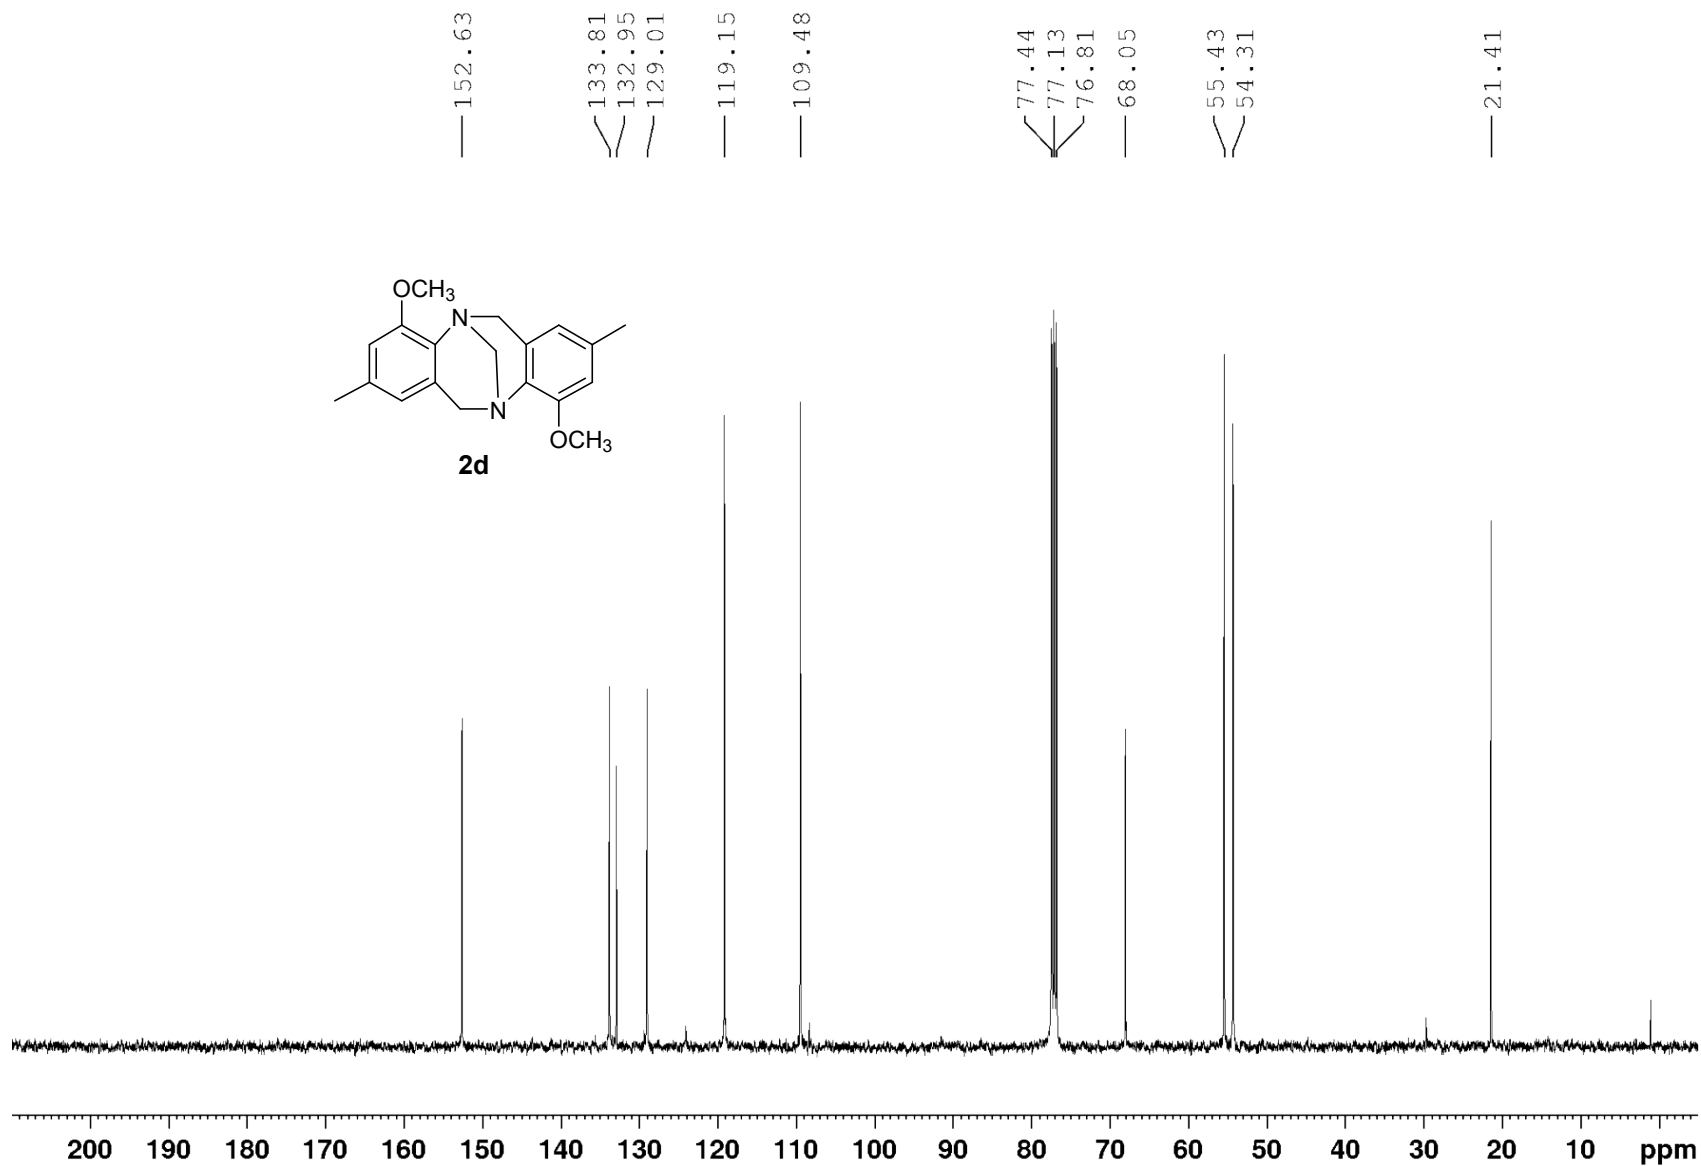

$^1\text{H}$  NMR spectrum of diastereomeric salt **4**[(-)-DBTA•(+)-**2d**]

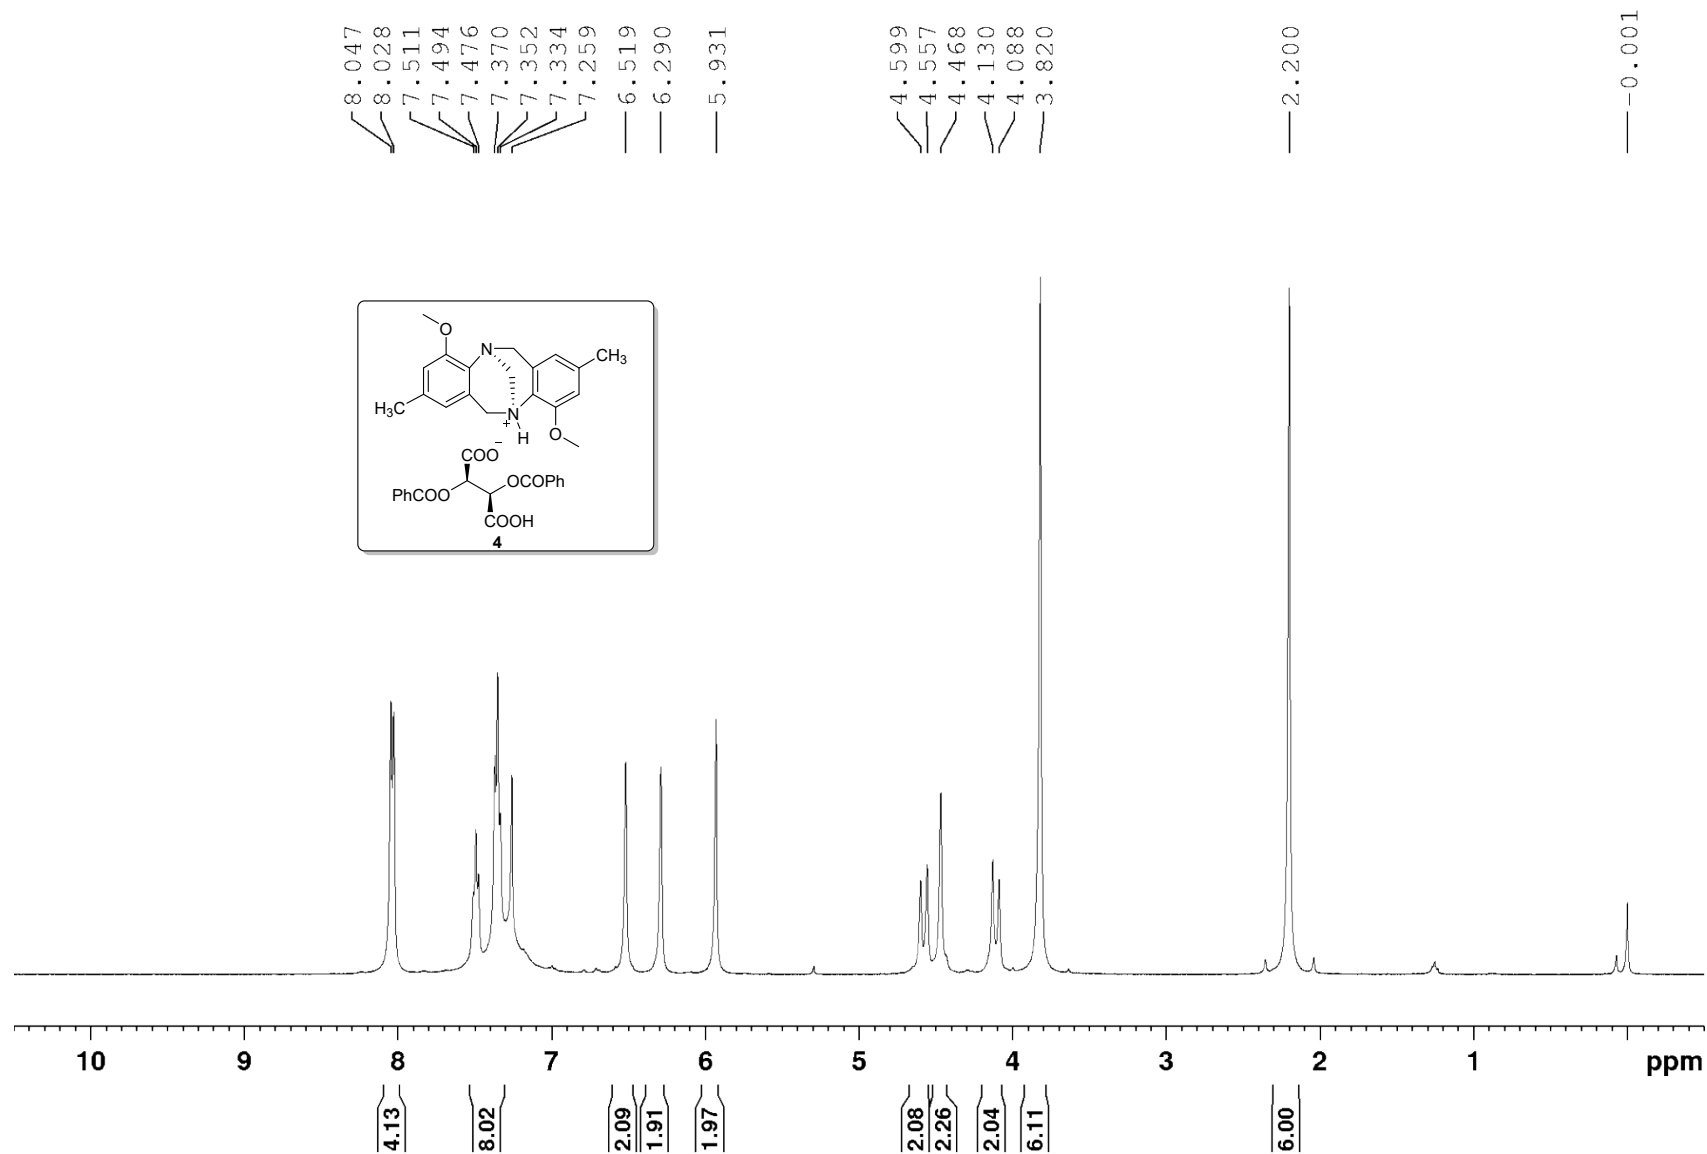

$^{13}\text{C}$  NMR spectrum of diastereomeric salt **4**[(-)-DBTA•(+)-**2d**]

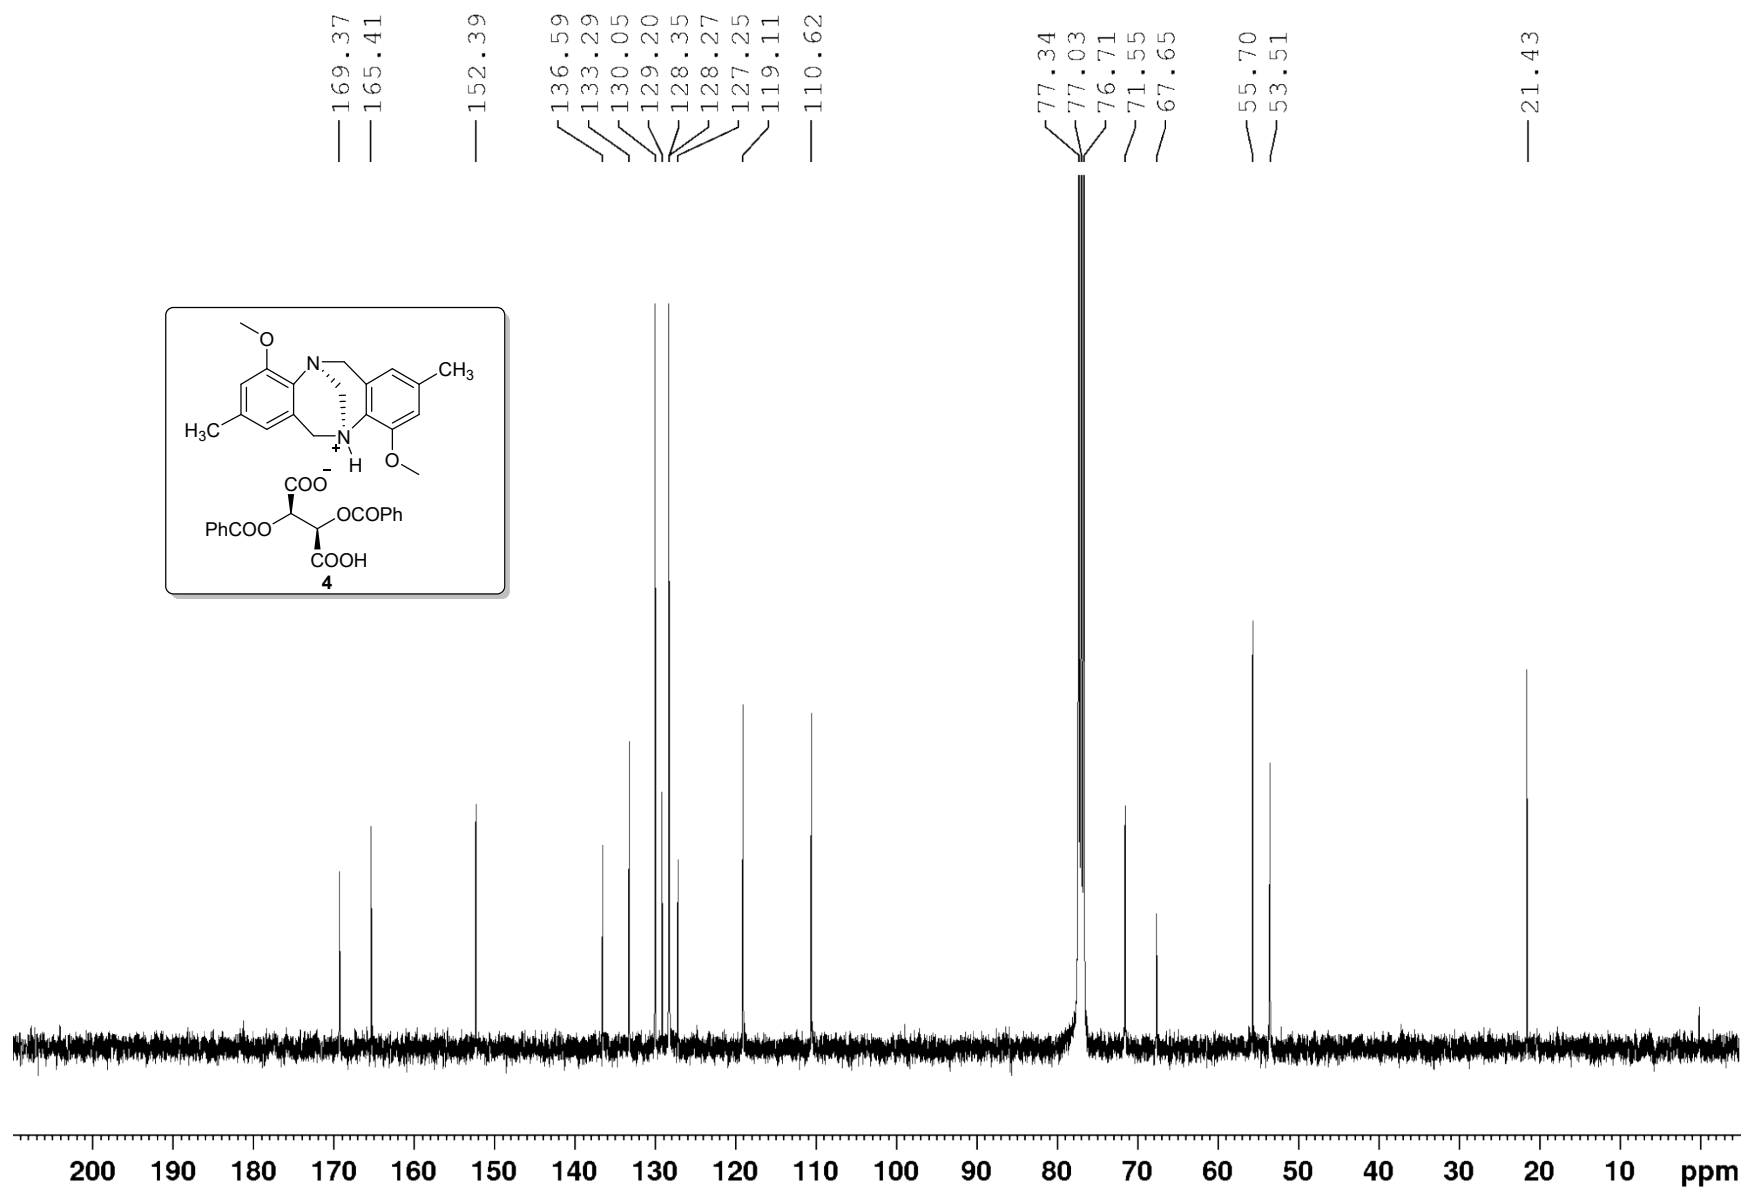

<sup>1</sup>H NMR spectrum of compound **6aa**

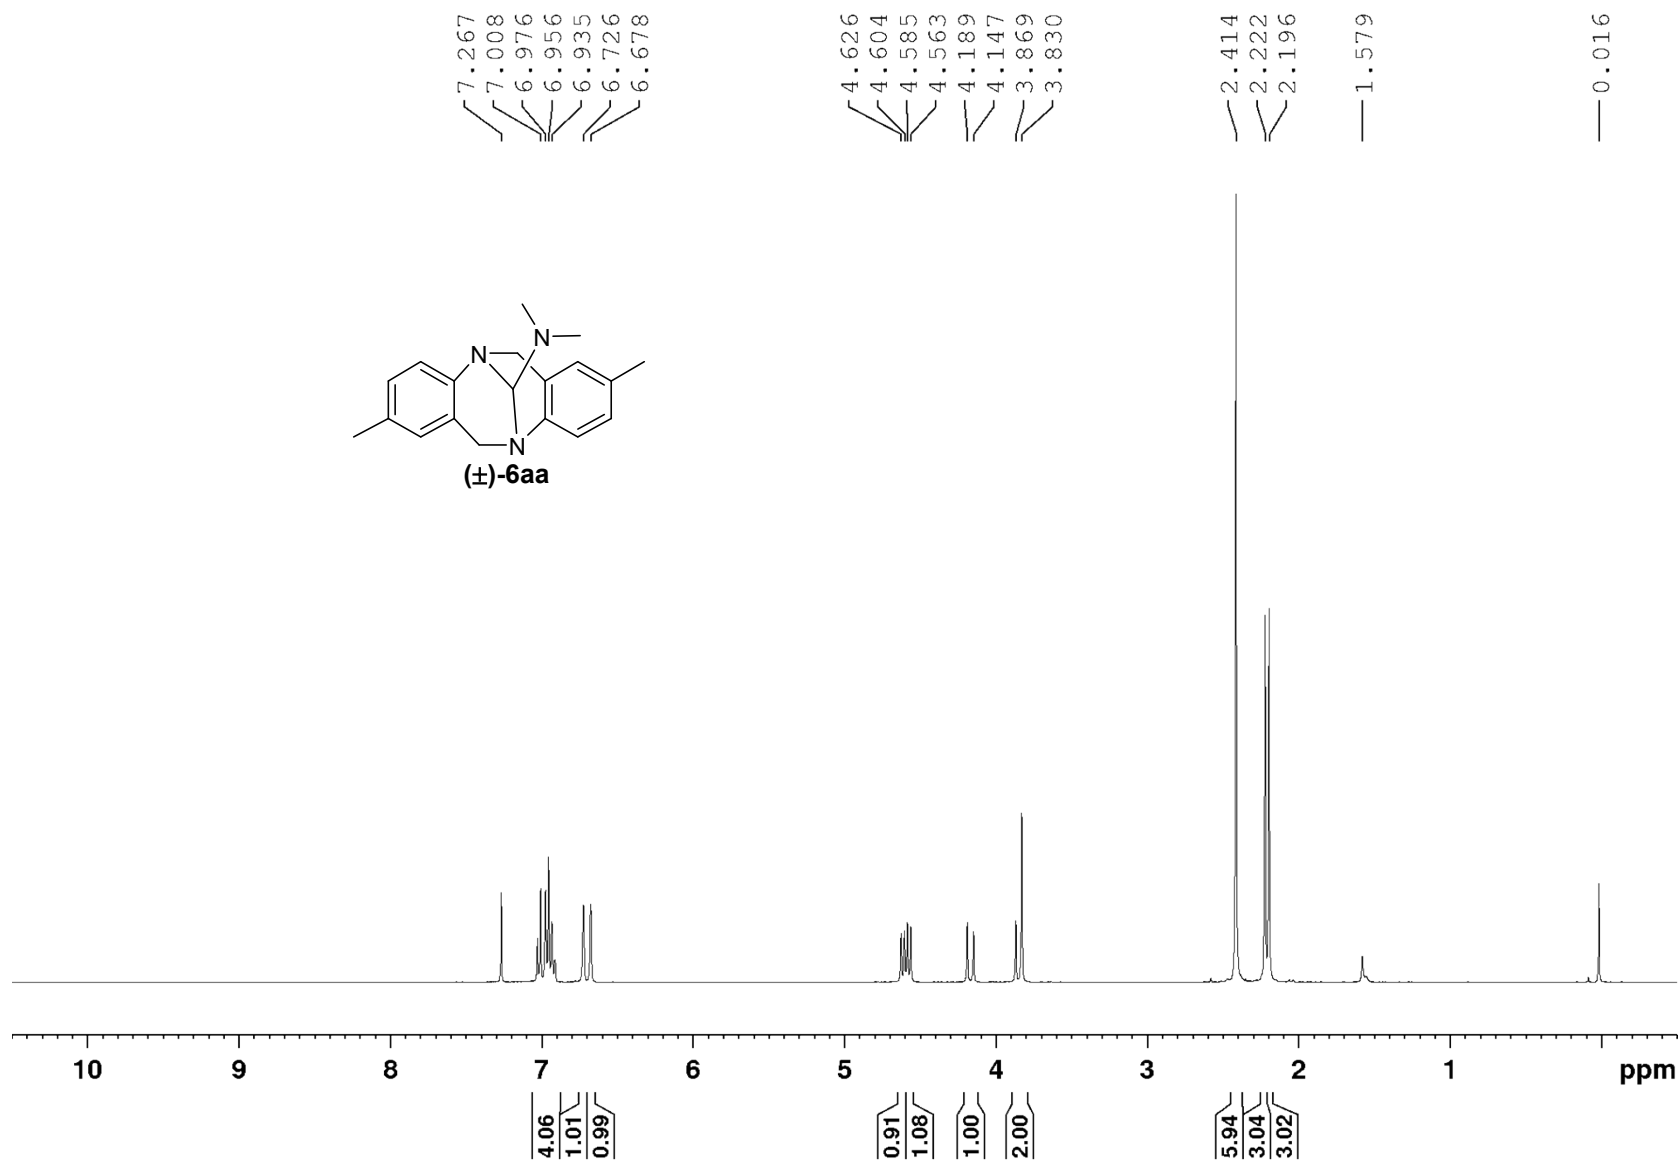

<sup>13</sup>C NMR spectrum of compound **6aa**

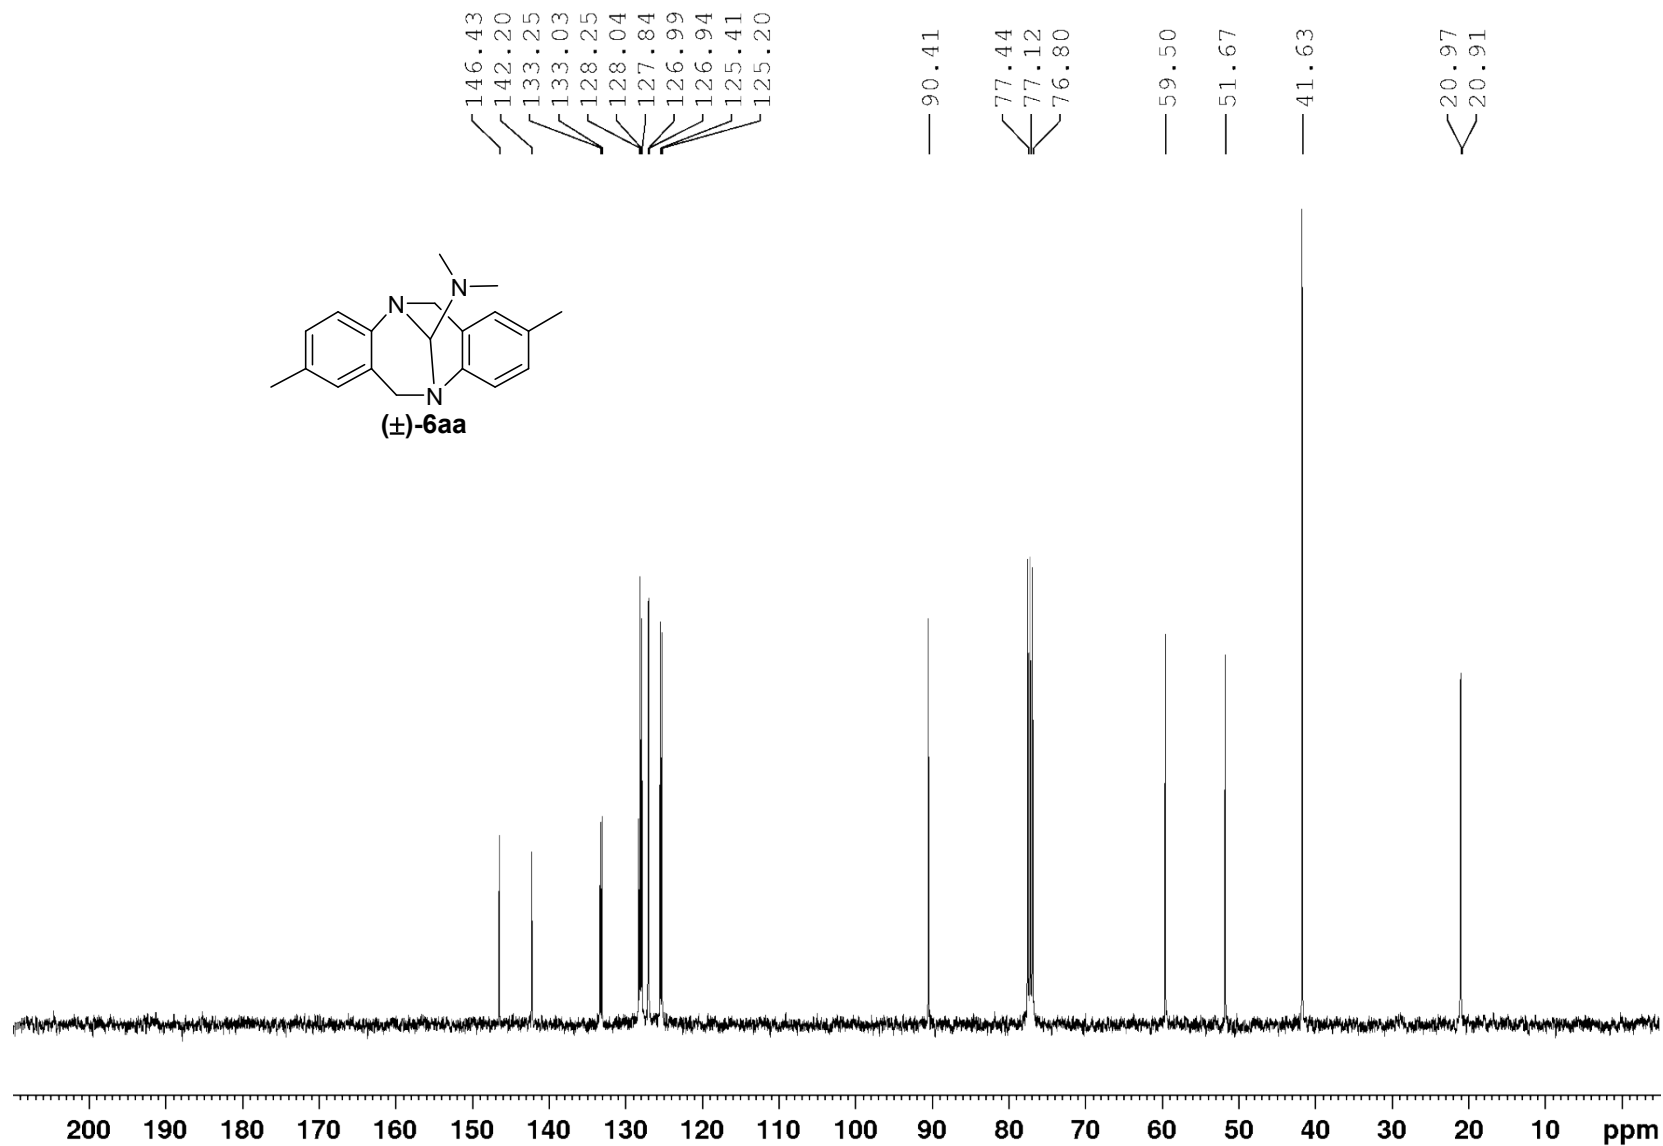

<sup>1</sup>H NMR spectrum of compound **6ba**

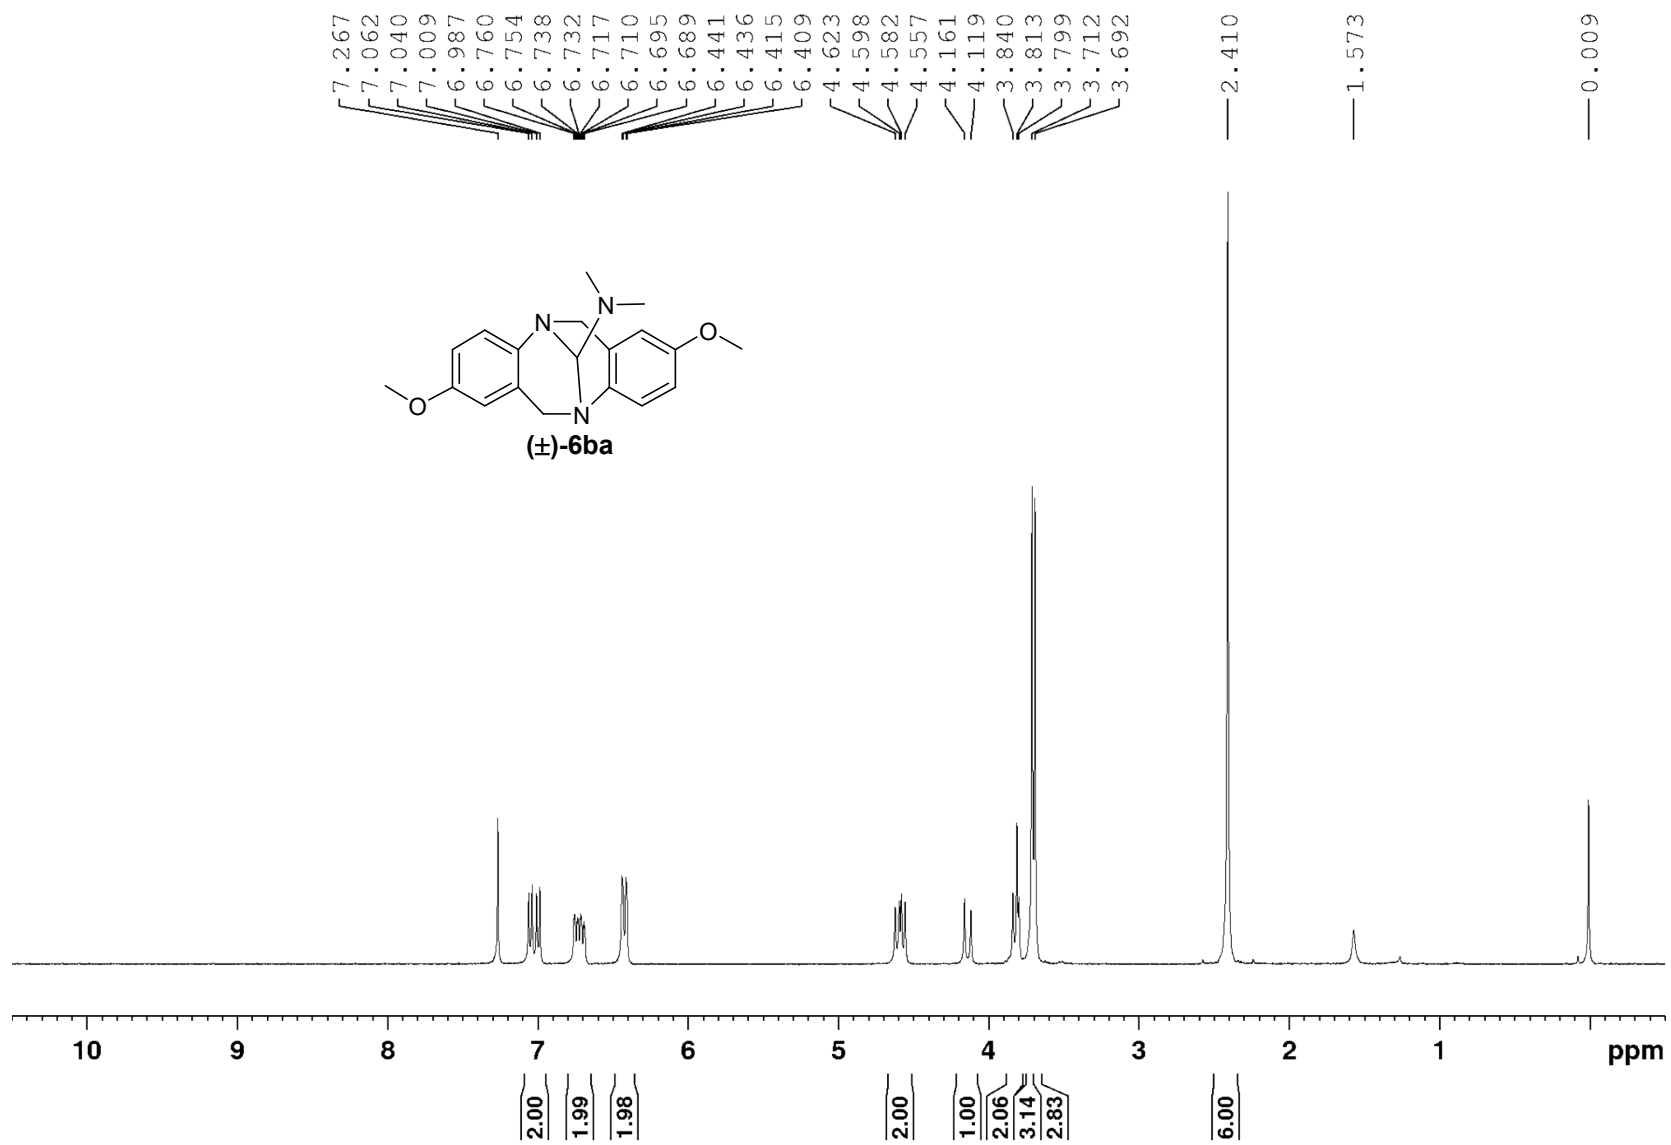

<sup>13</sup>C NMR spectrum of compound **6ba**

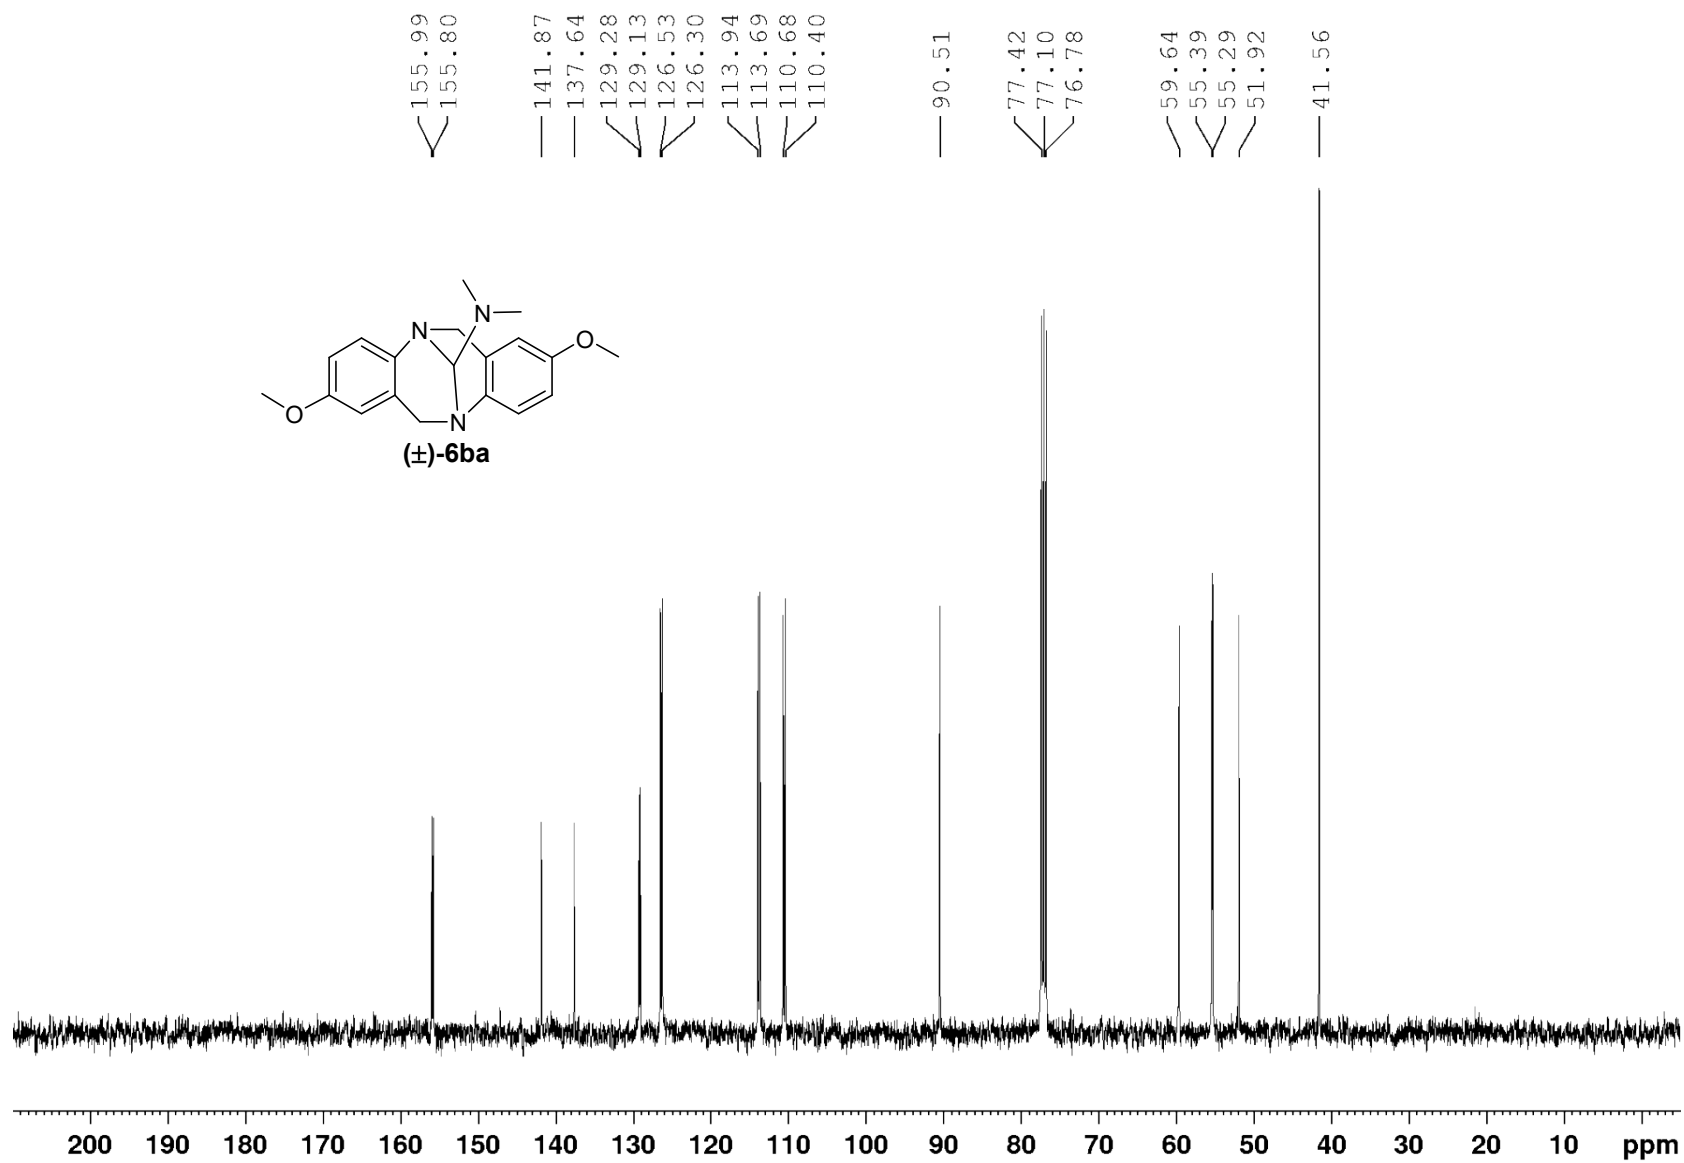

<sup>1</sup>H NMR spectrum of compound **7ab**

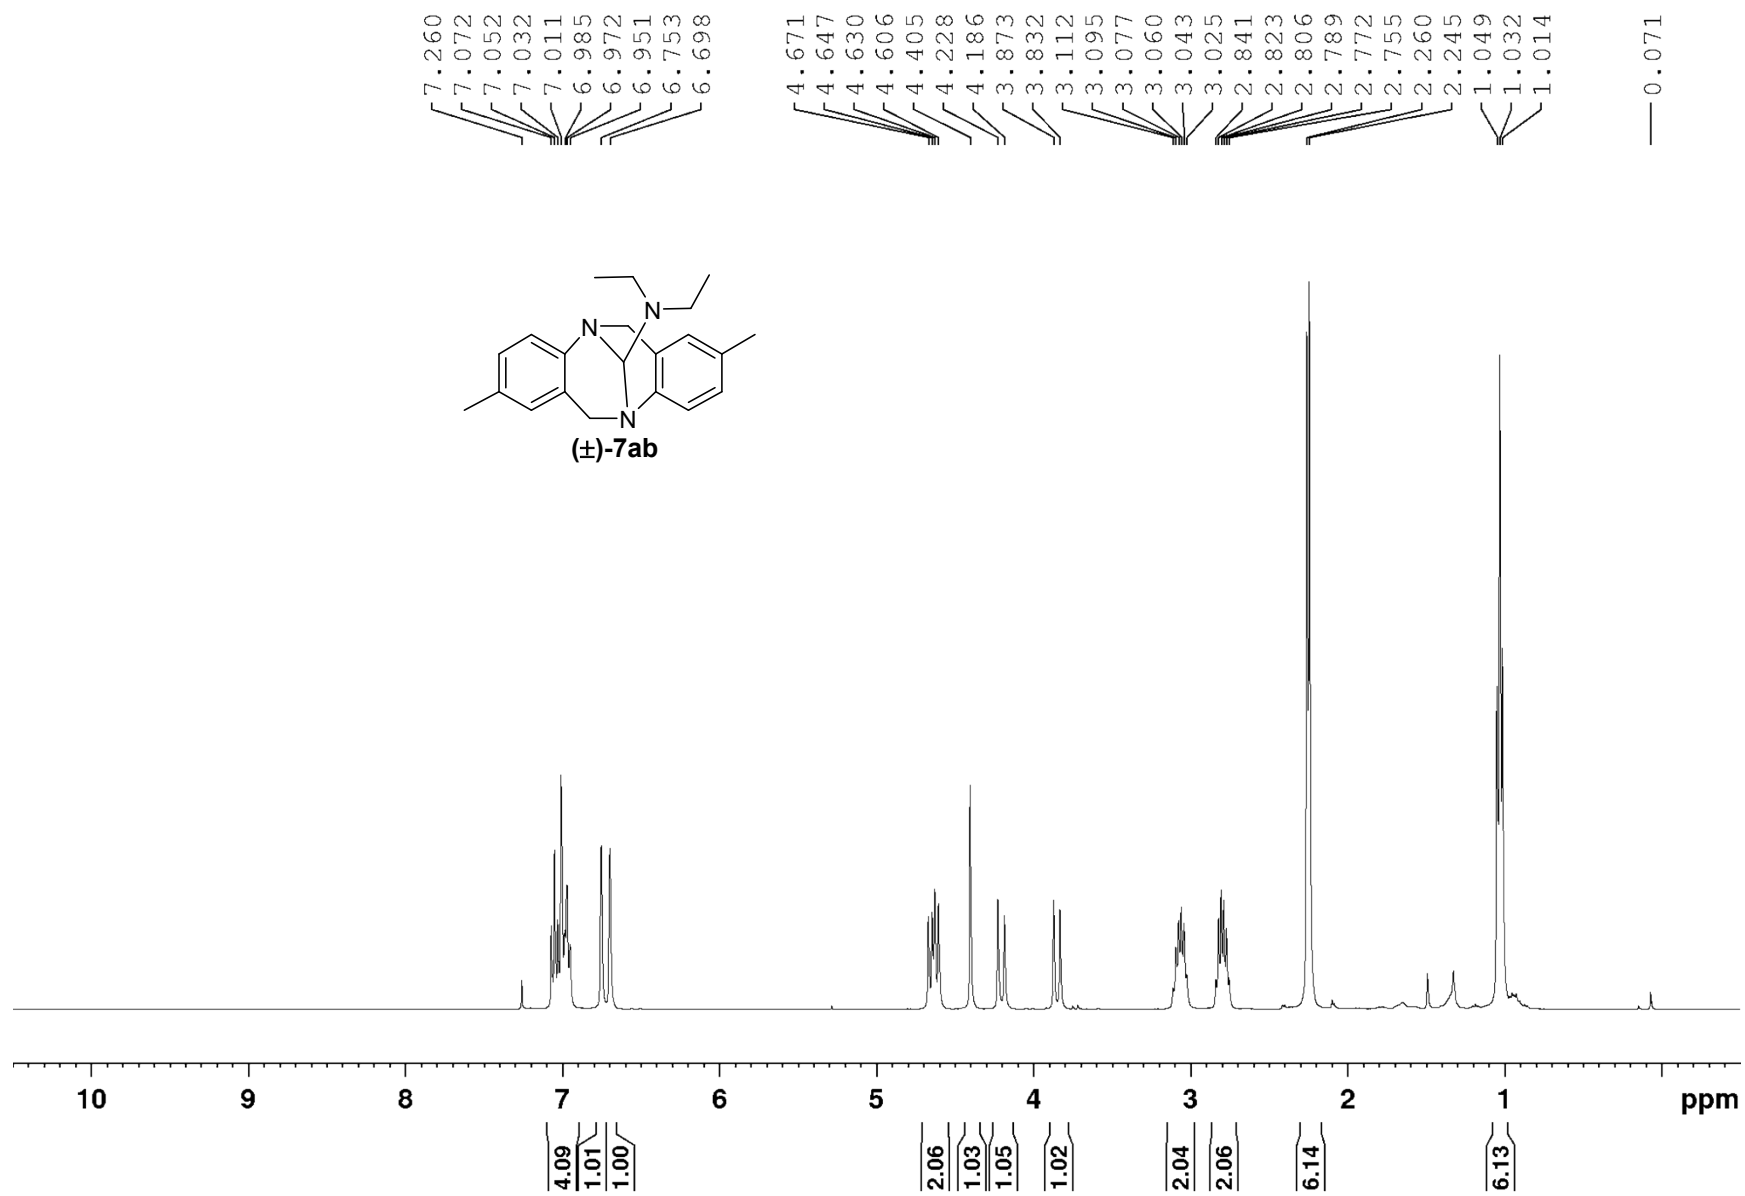

<sup>13</sup>C NMR spectrum of compound **7ab**

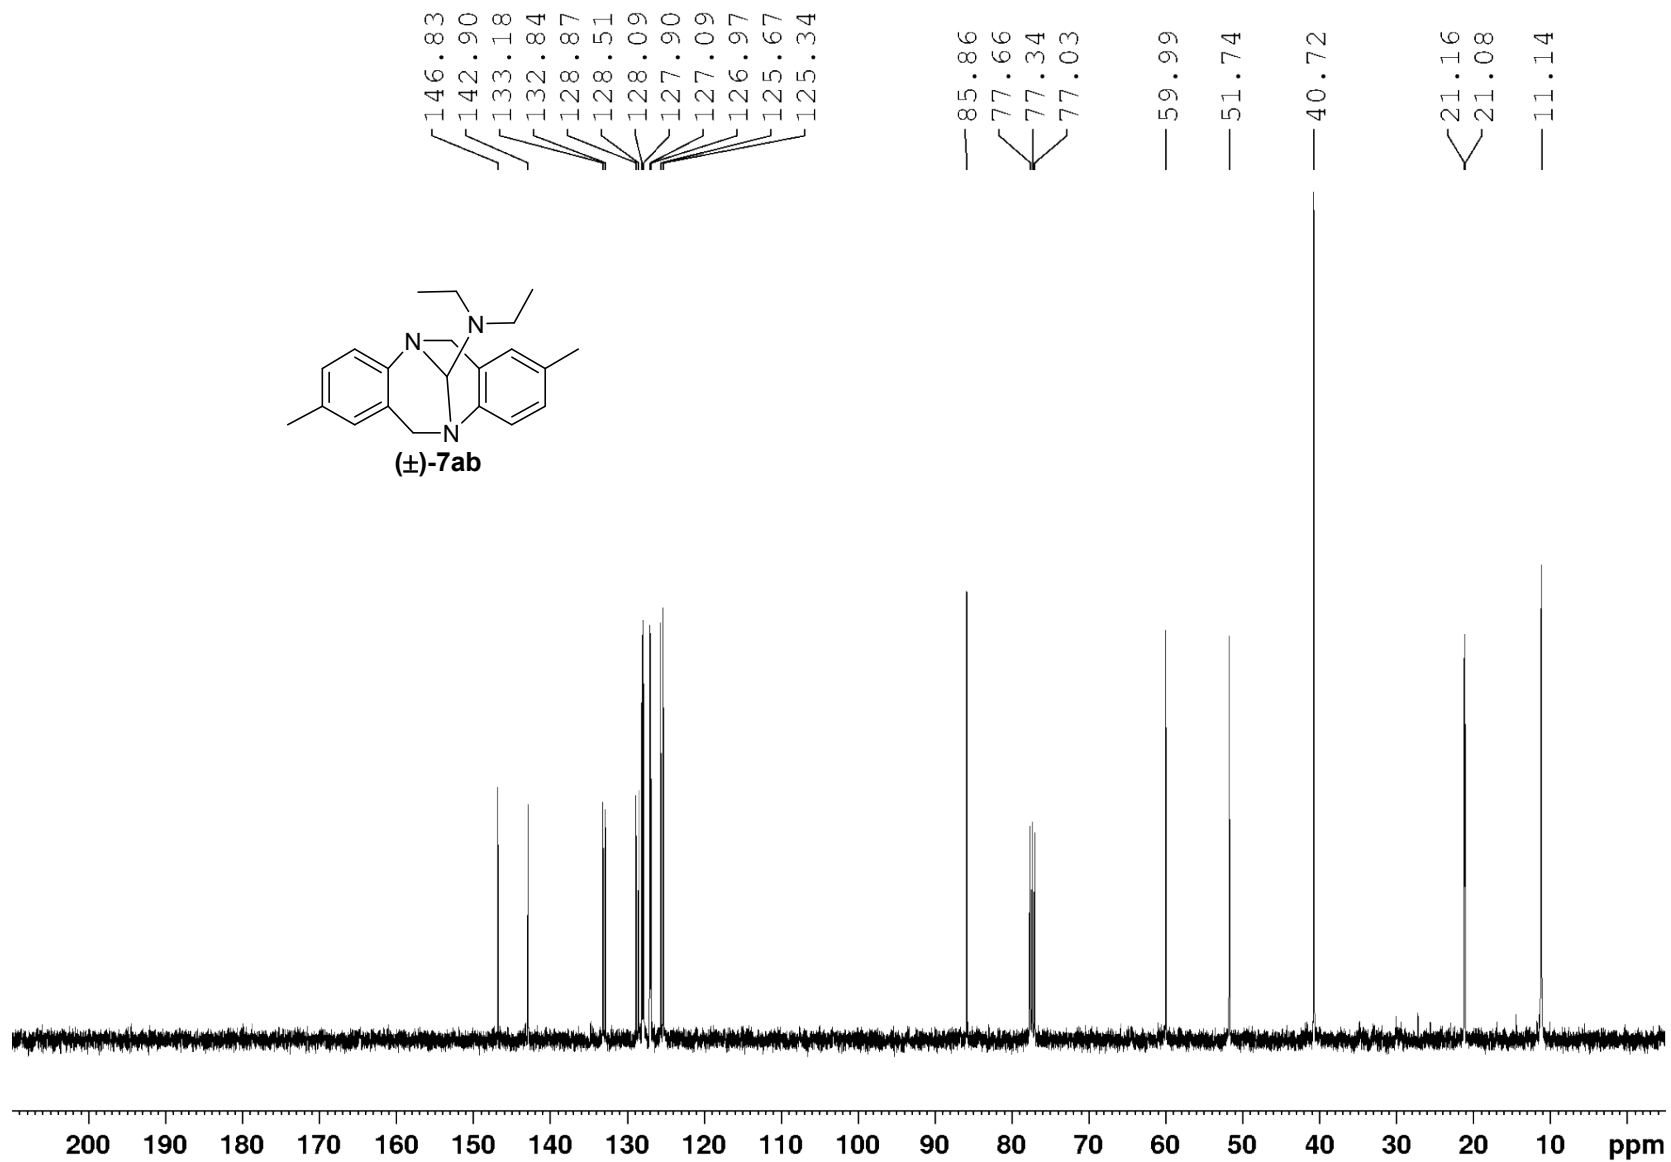

<sup>1</sup>H NMR spectrum of compound **7bb**

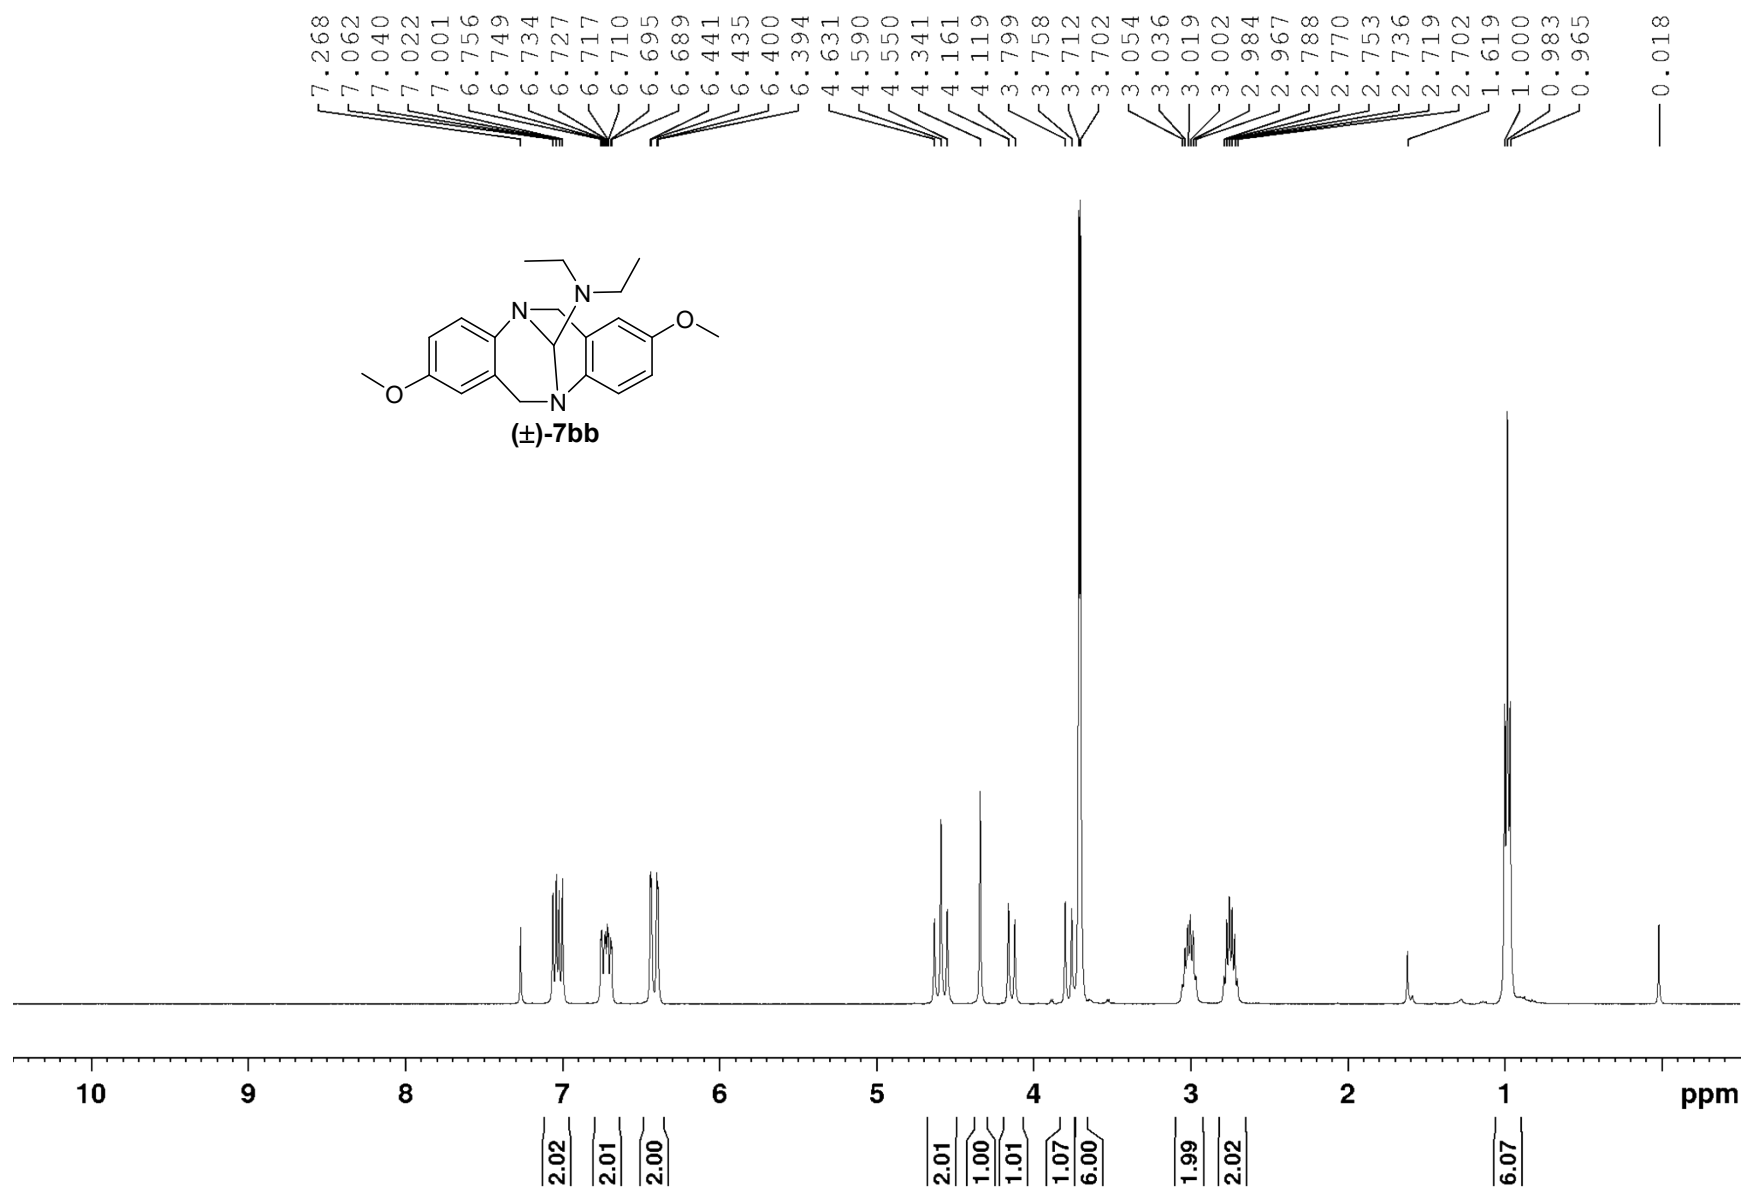

<sup>13</sup>C NMR spectrum of compound **7bb**

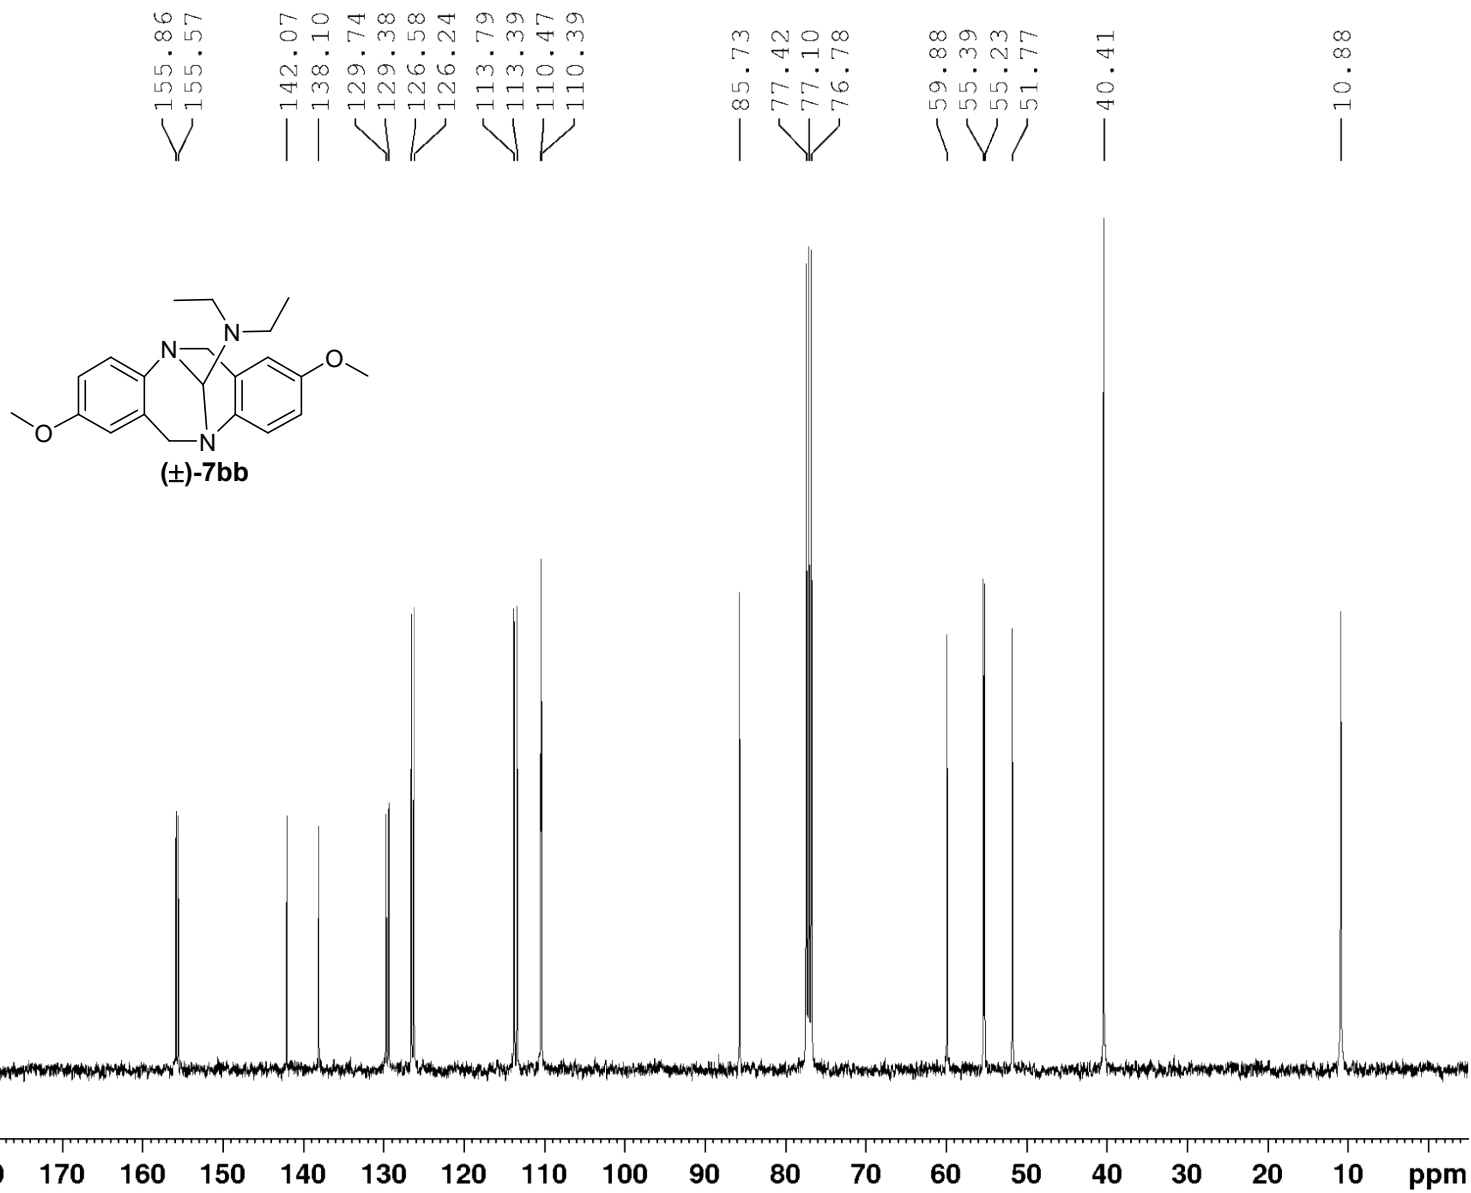

<sup>1</sup>H NMR spectrum of compound **8da**

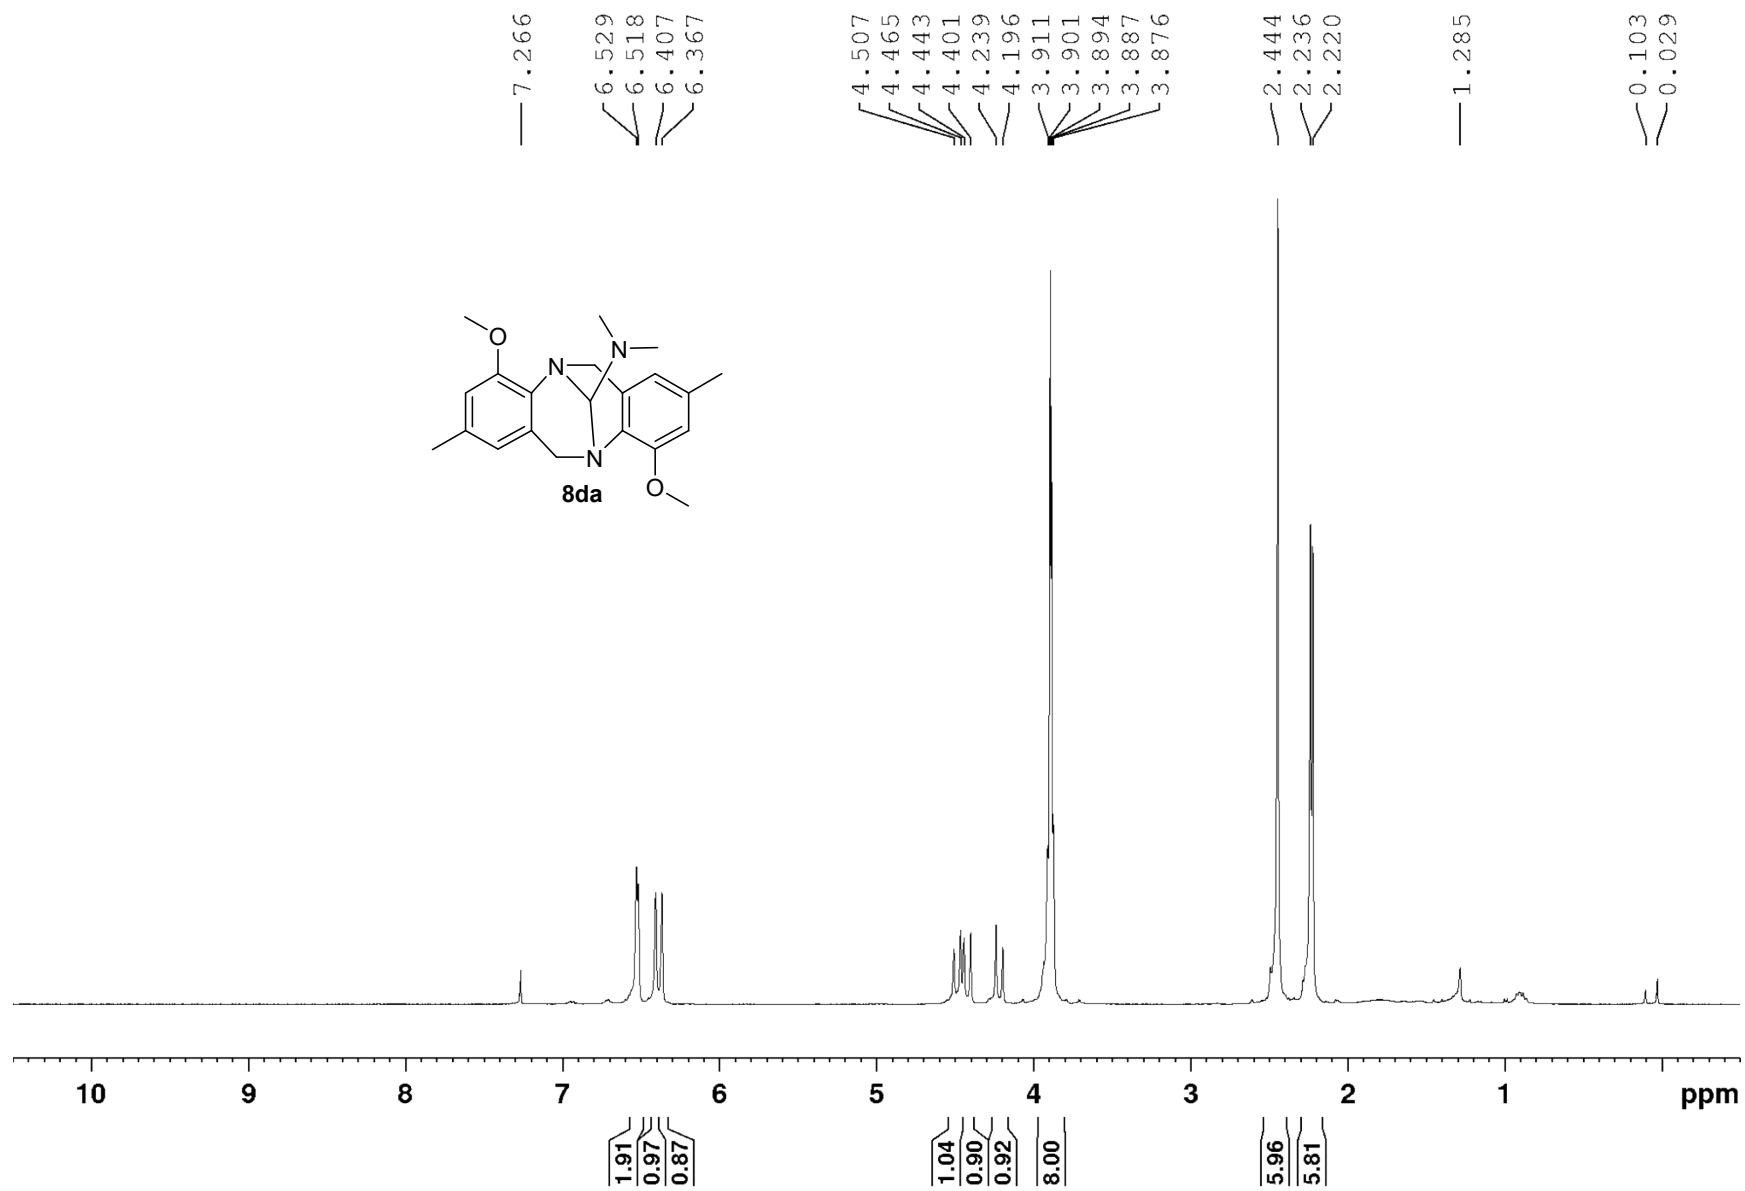

<sup>13</sup>C NMR spectrum of compound **8da**

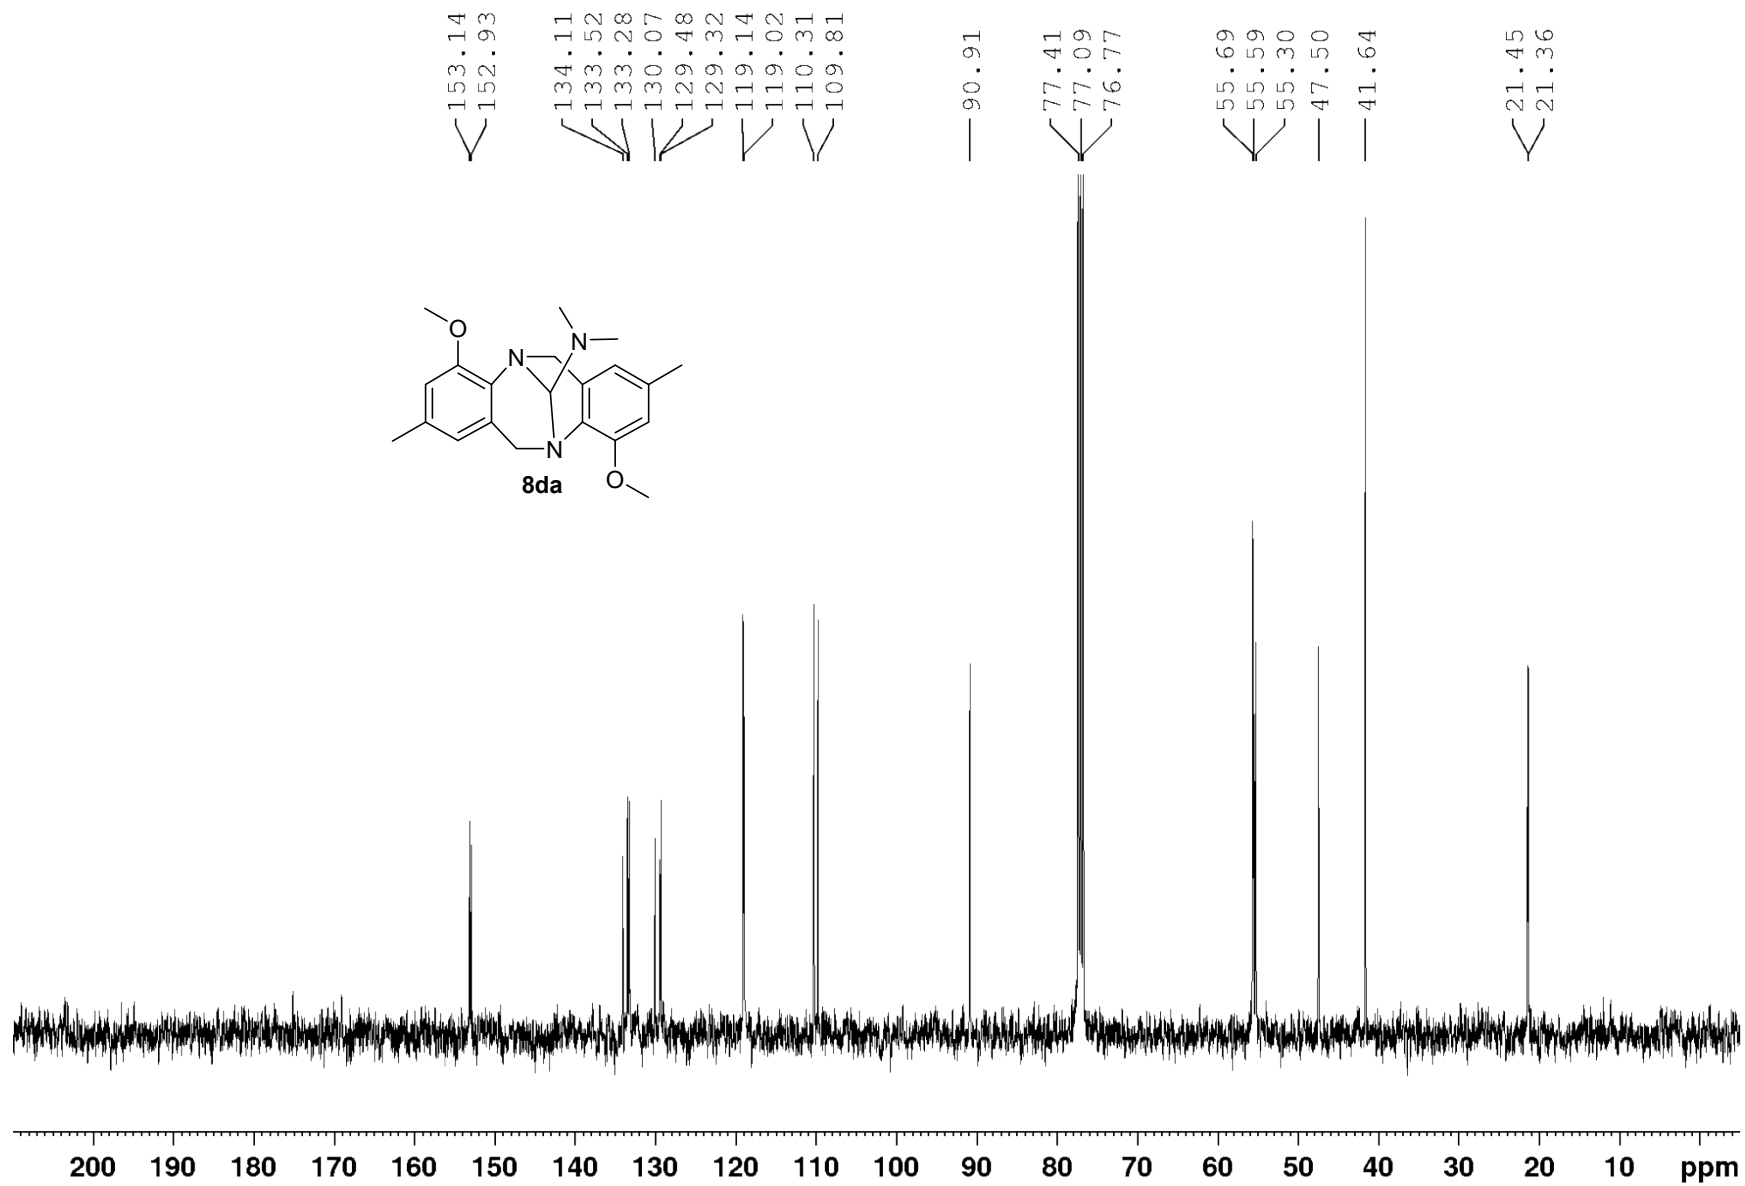

<sup>1</sup>H NMR spectrum of compound **8ea**

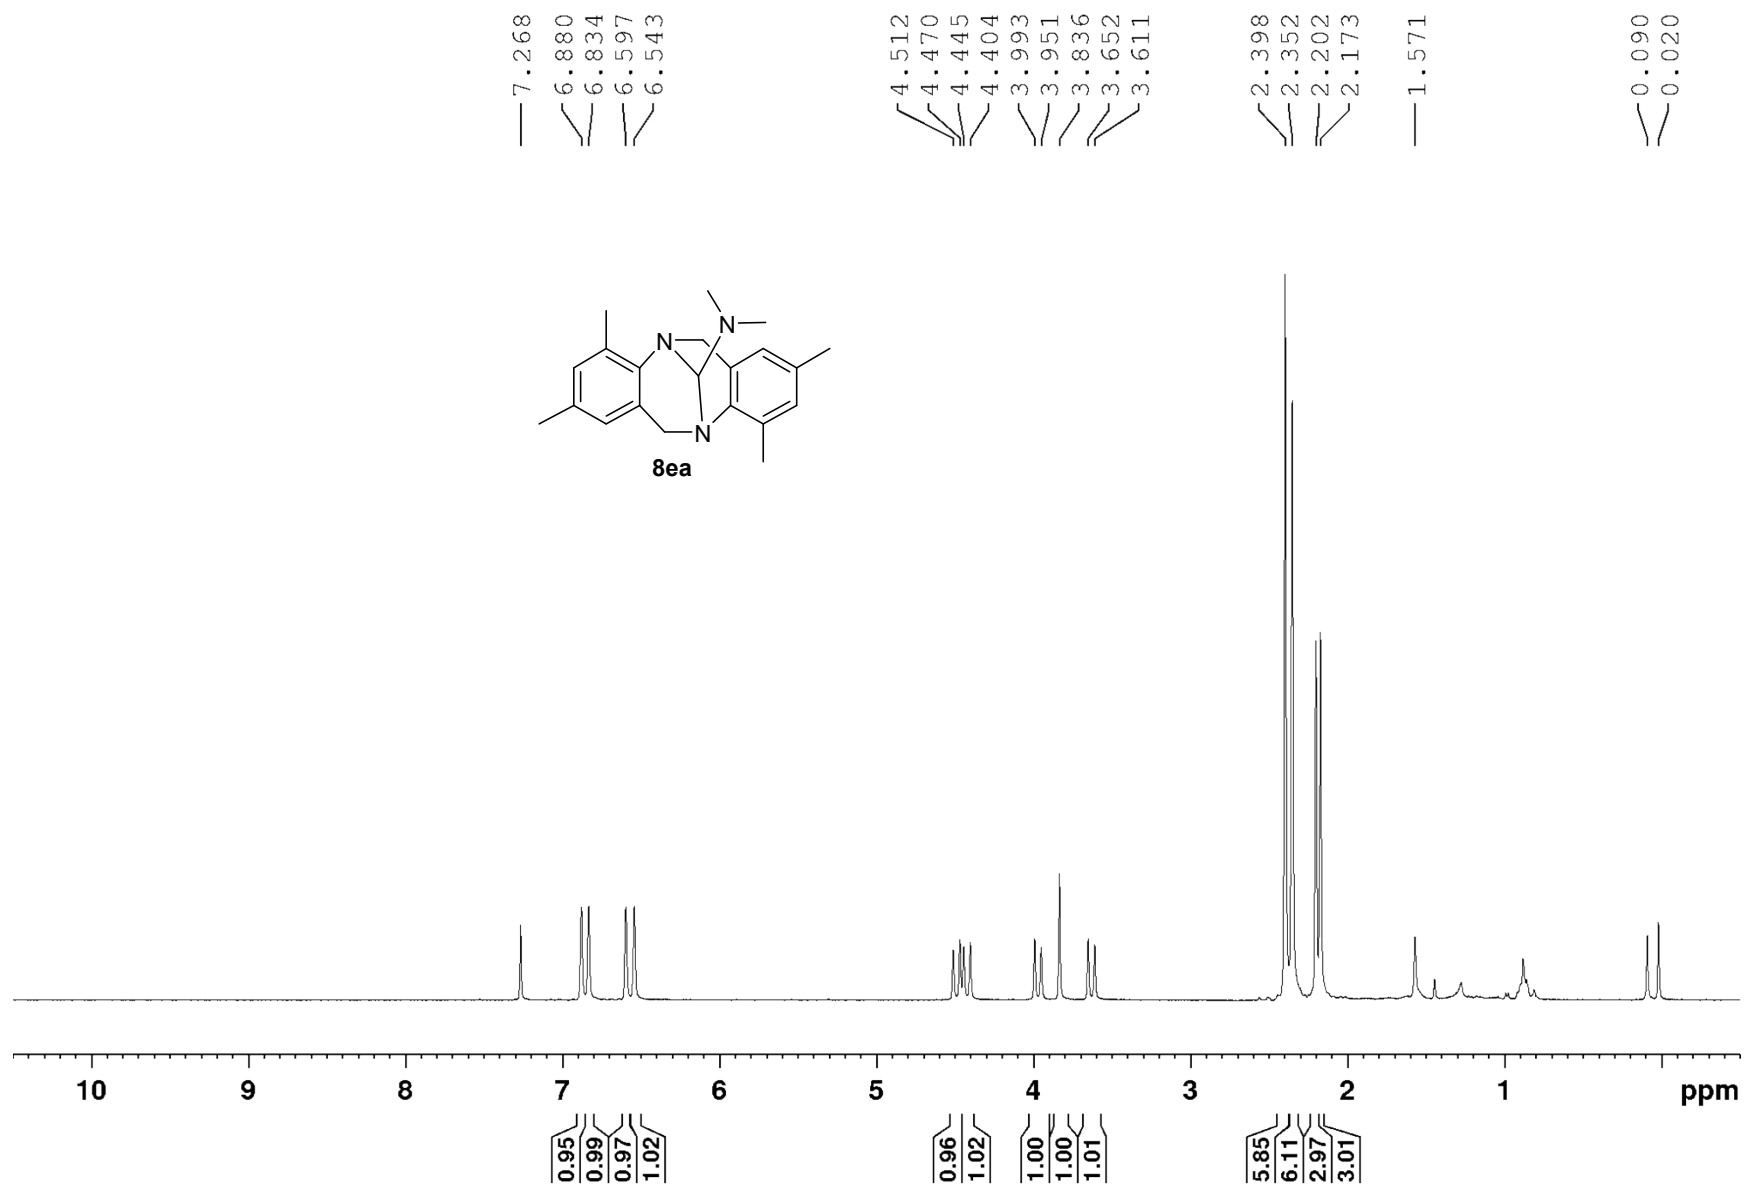

<sup>13</sup>C NMR spectrum of compound **8ea**

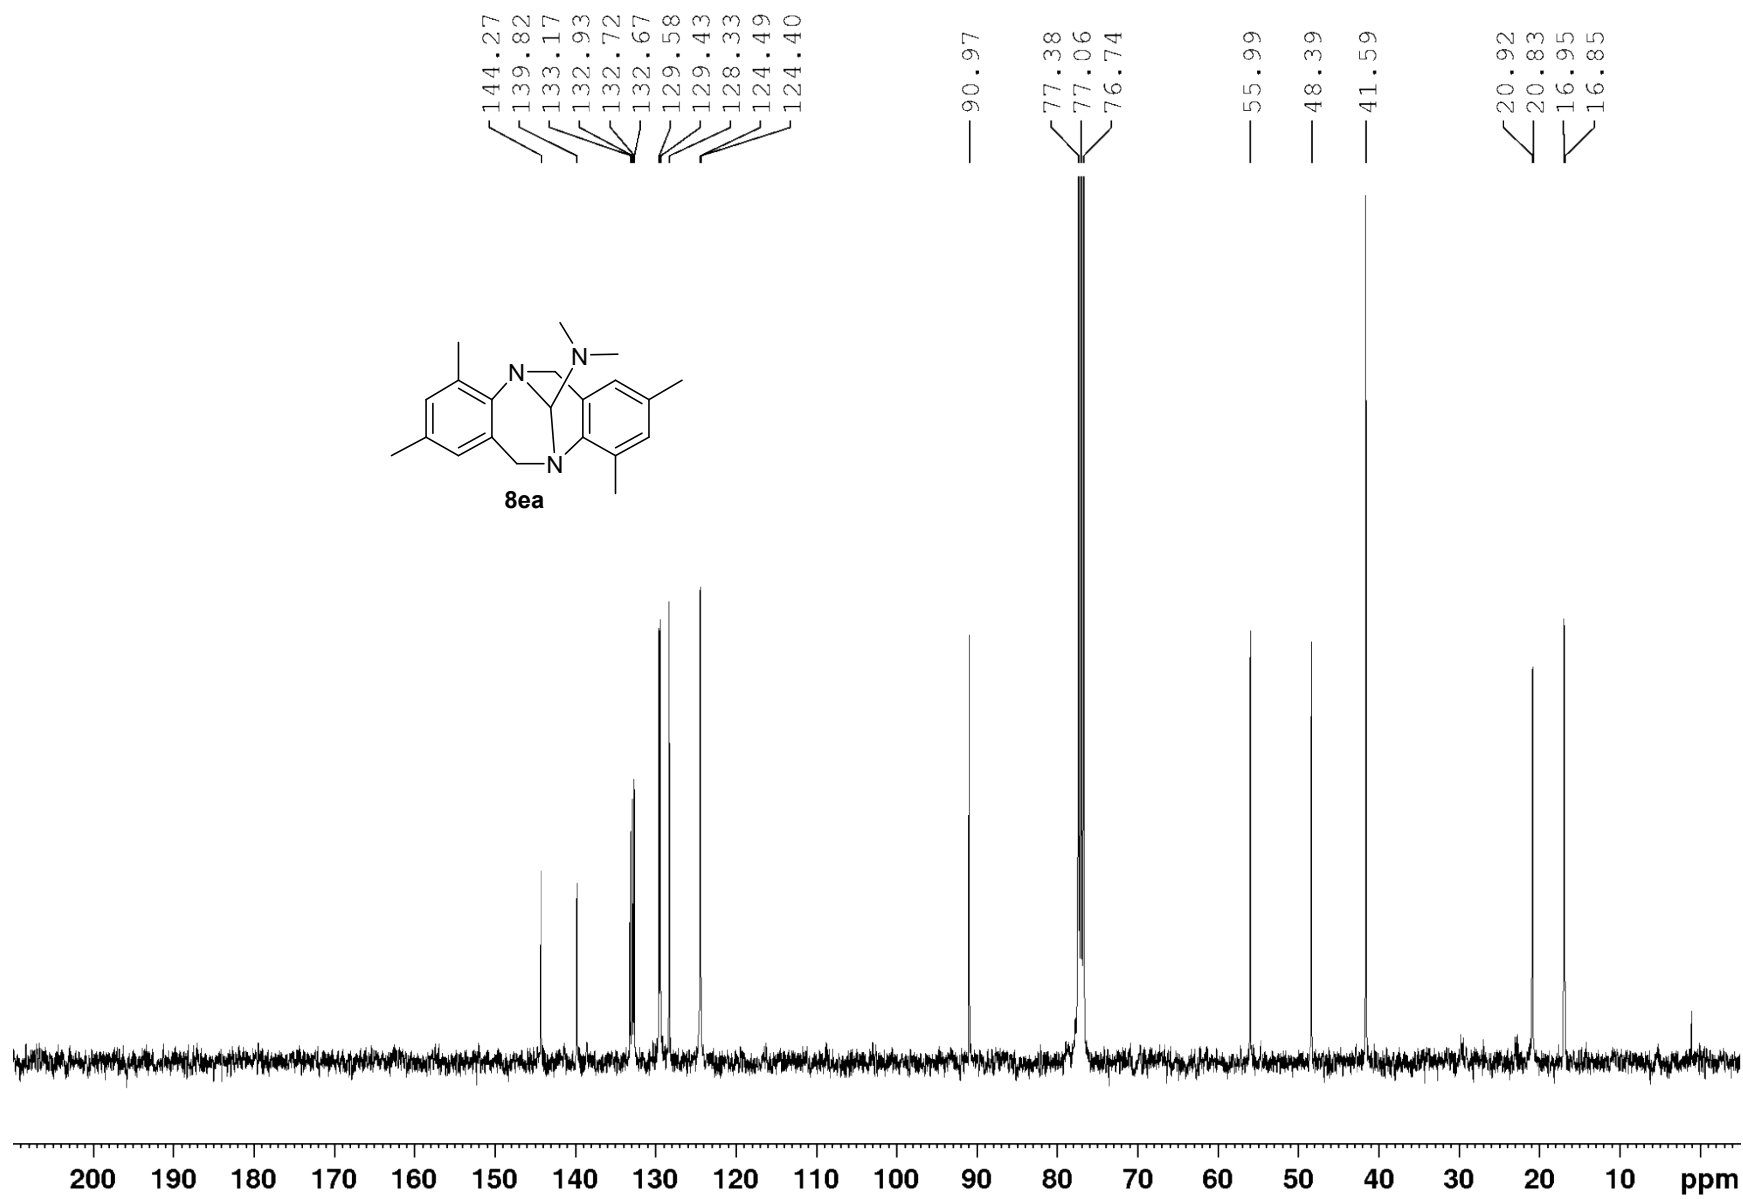

<sup>1</sup>H NMR spectrum of compound **9b**

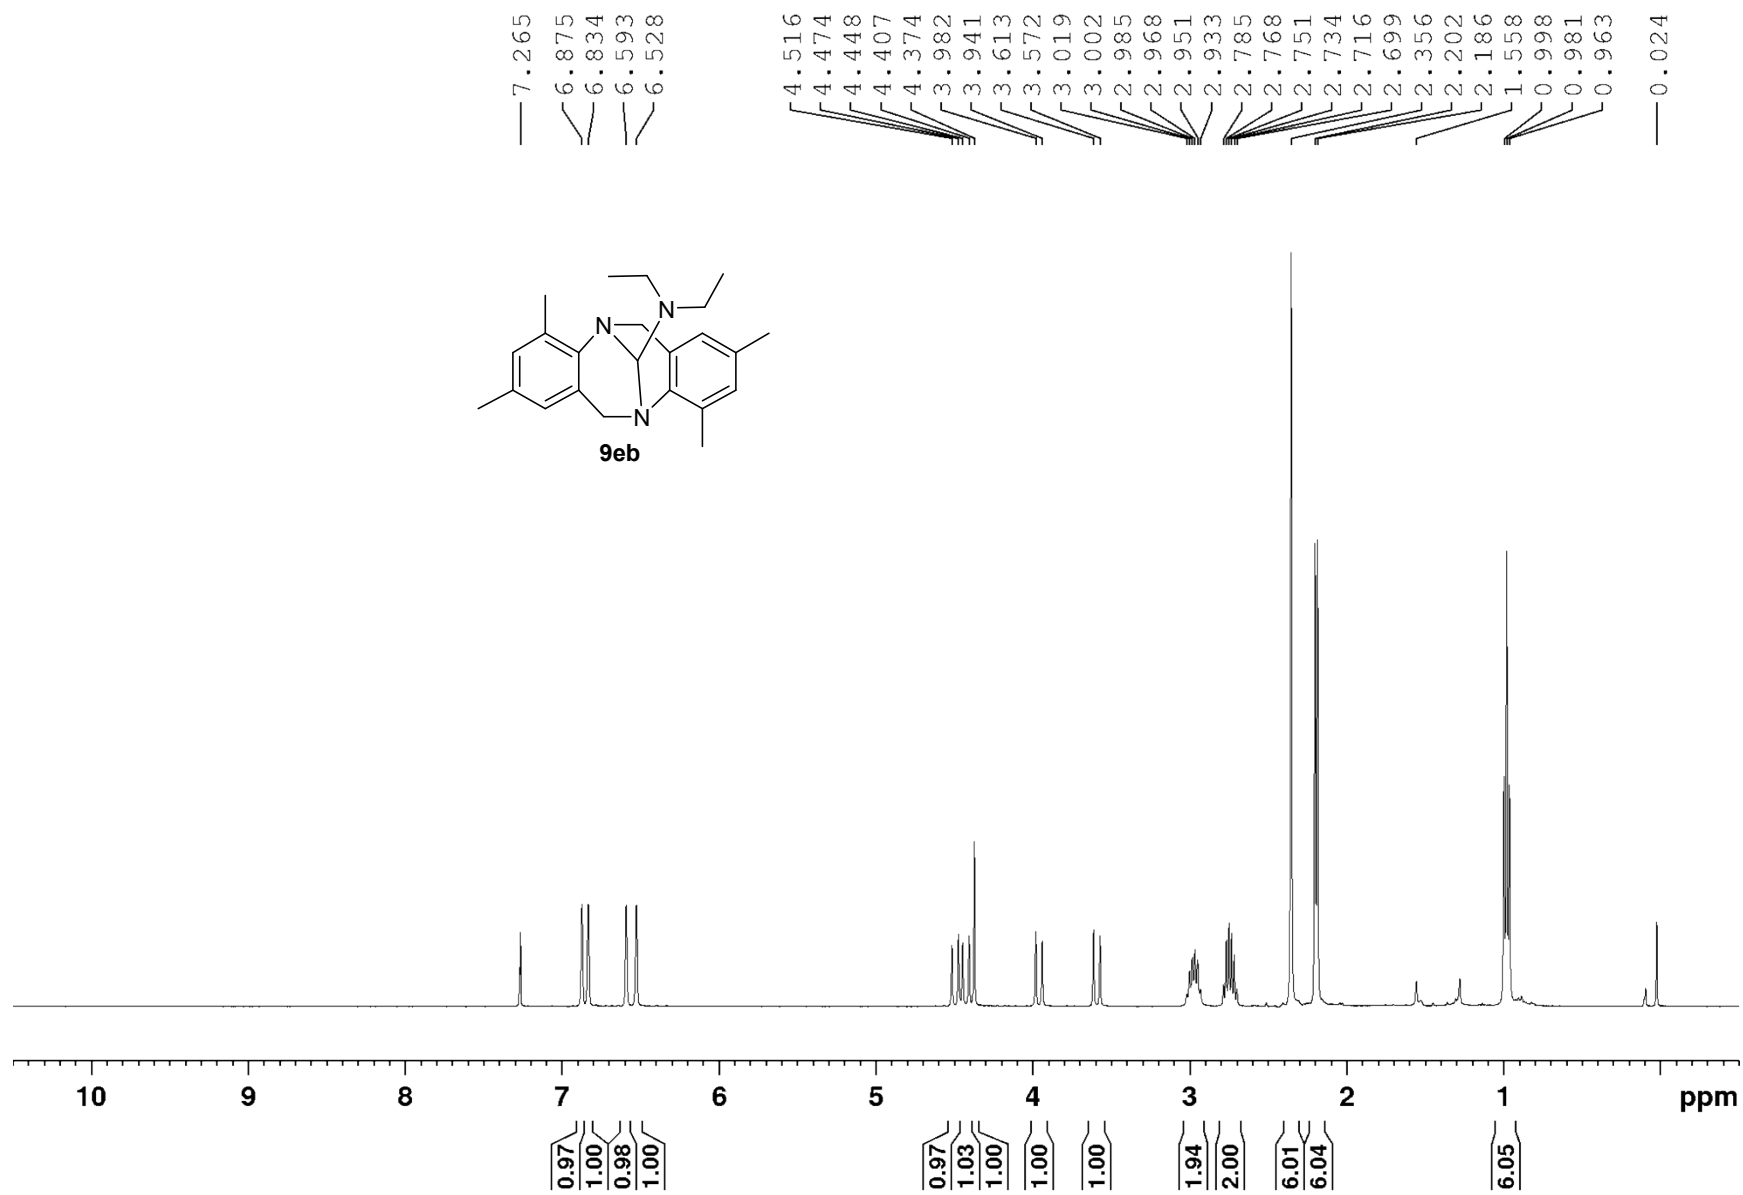

<sup>13</sup>C NMR spectrum of compound **9eb**

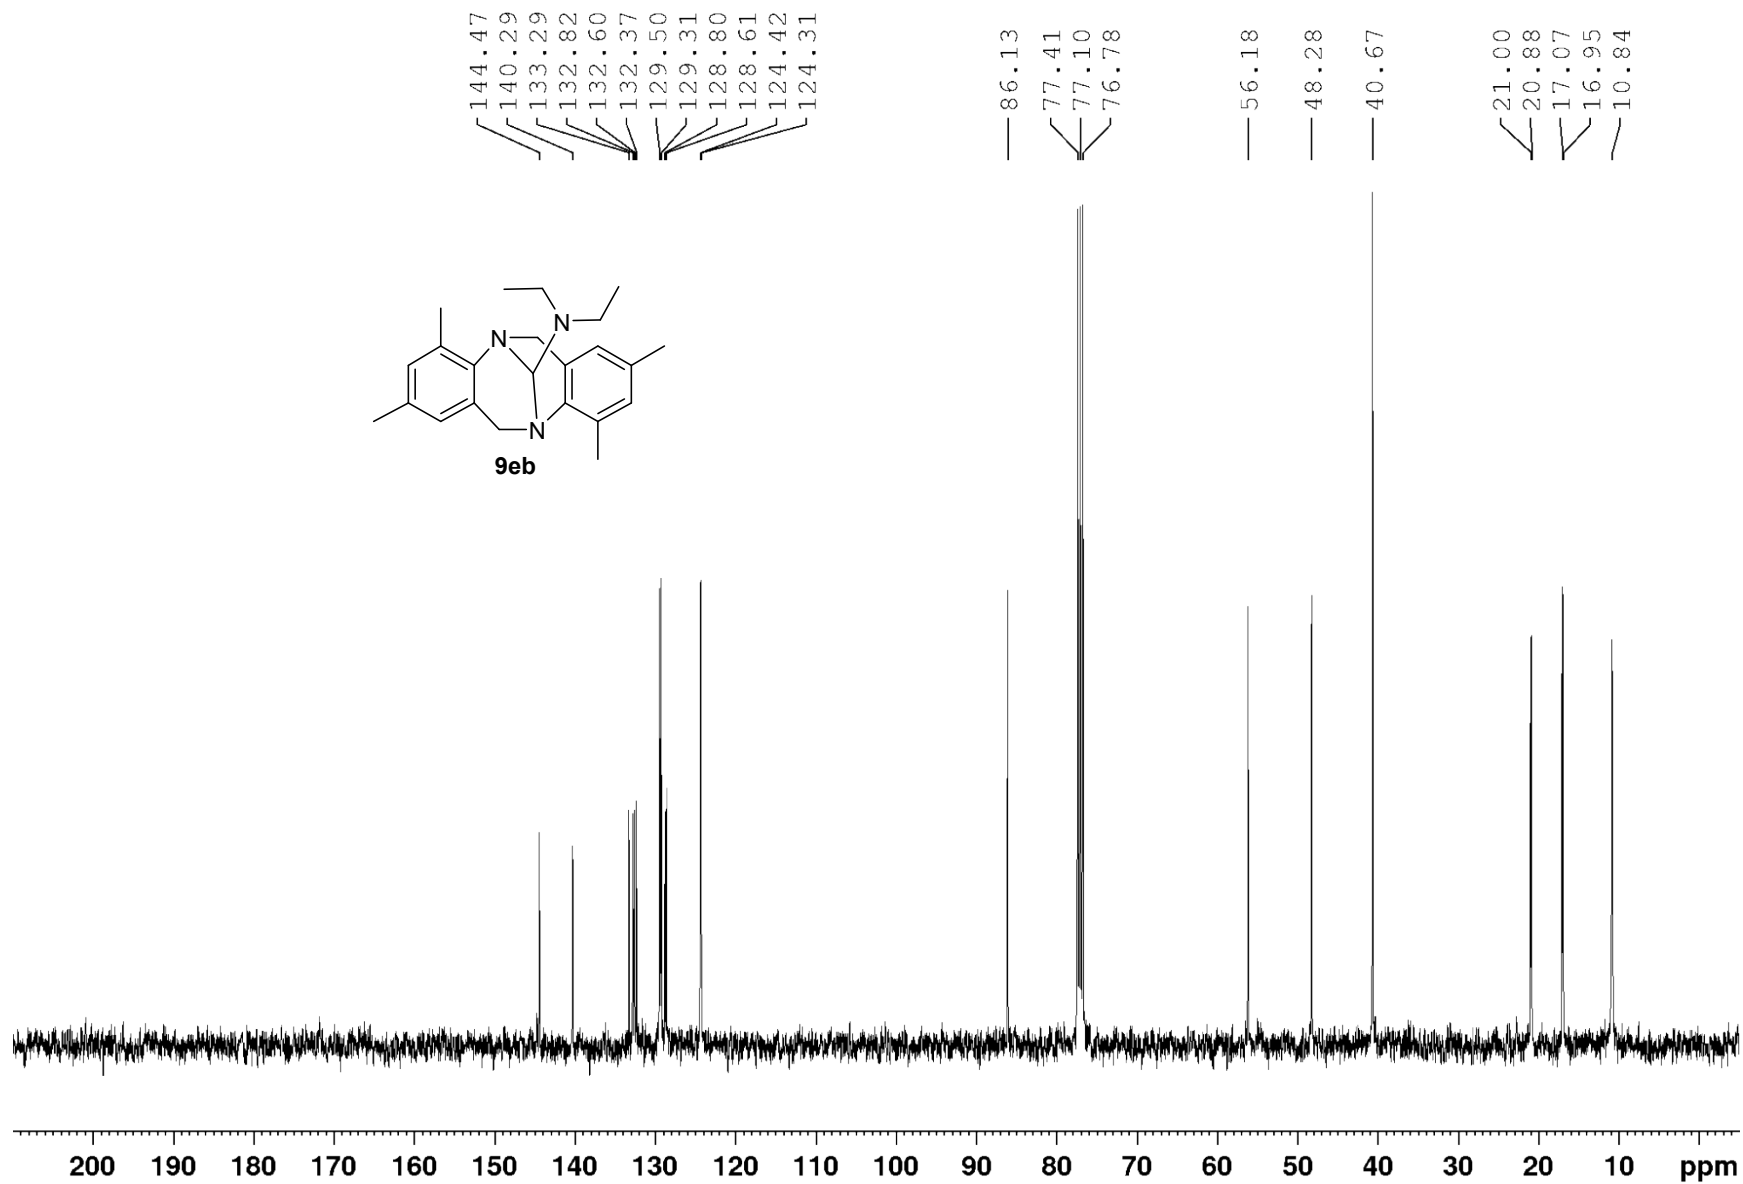

<sup>1</sup>H NMR spectrum of compound **8fa**

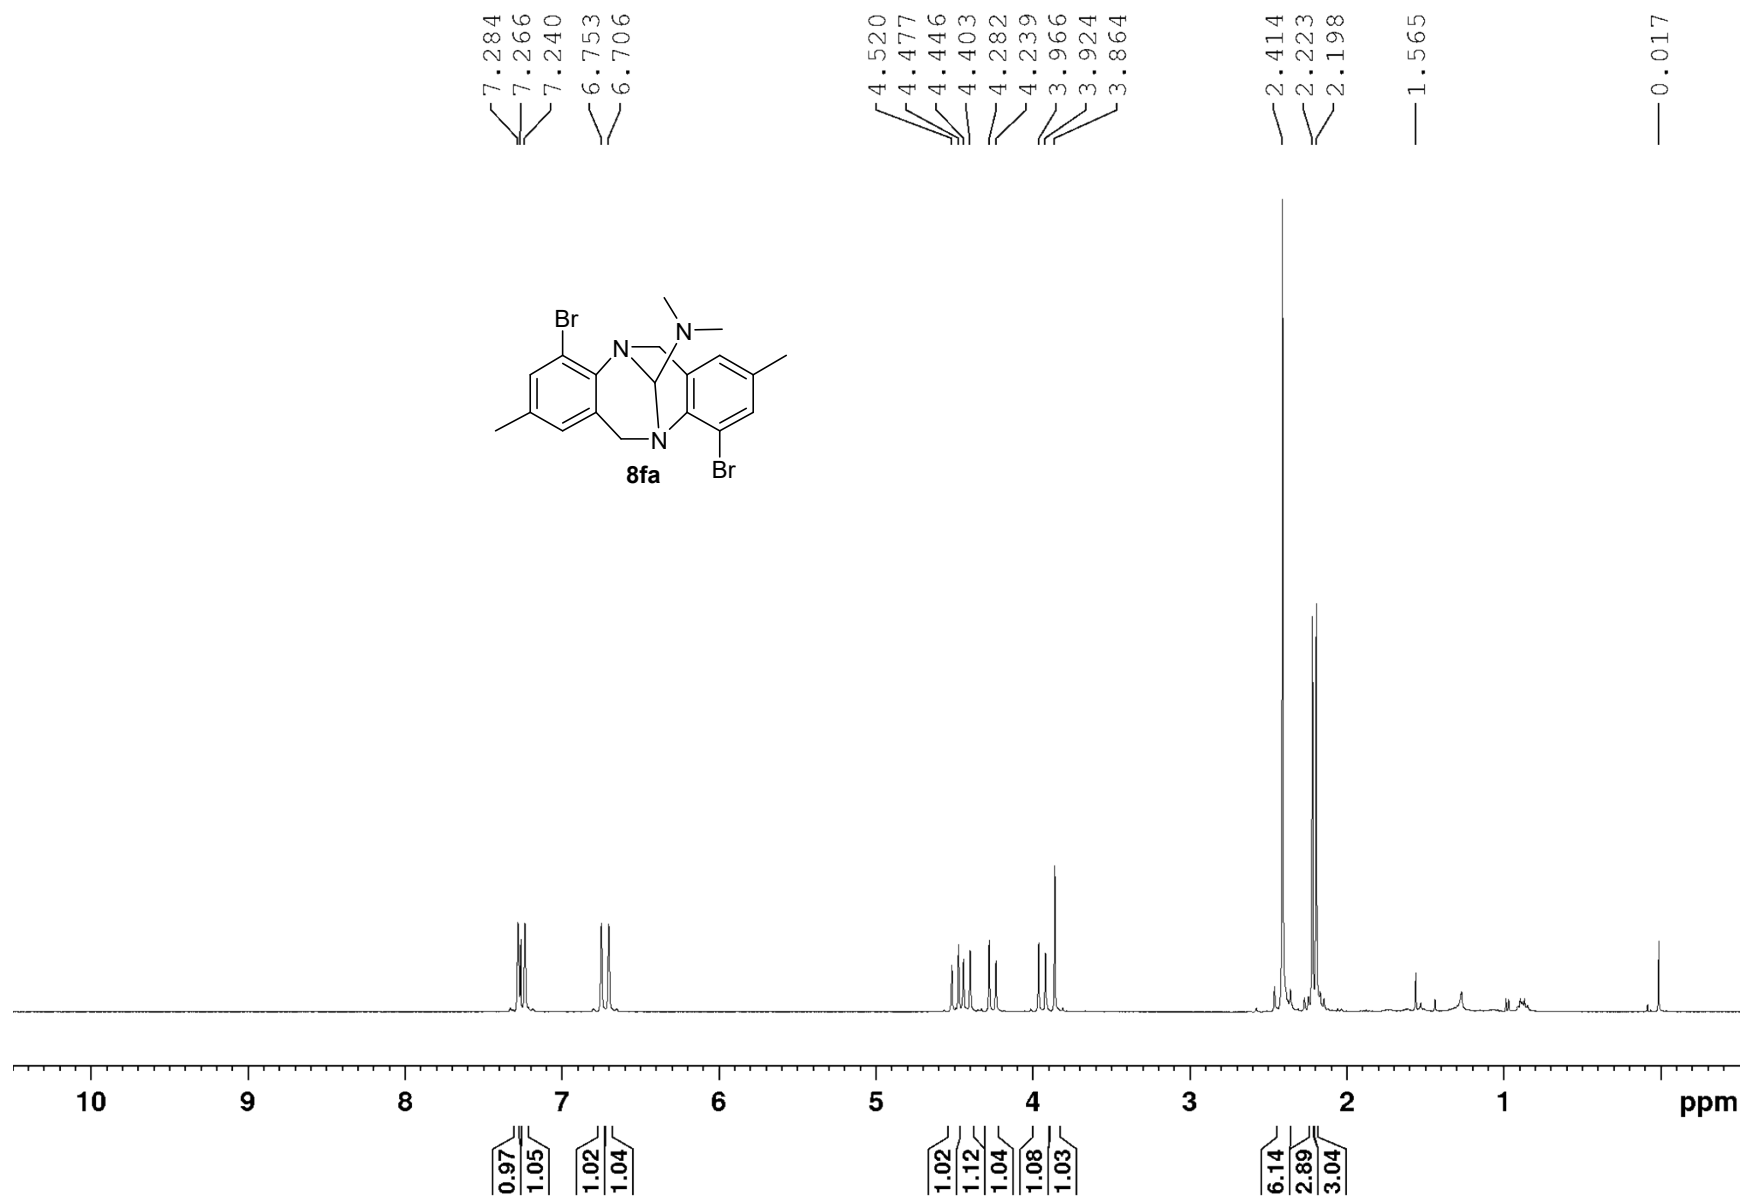

<sup>13</sup>C NMR spectrum of compound **8fa**

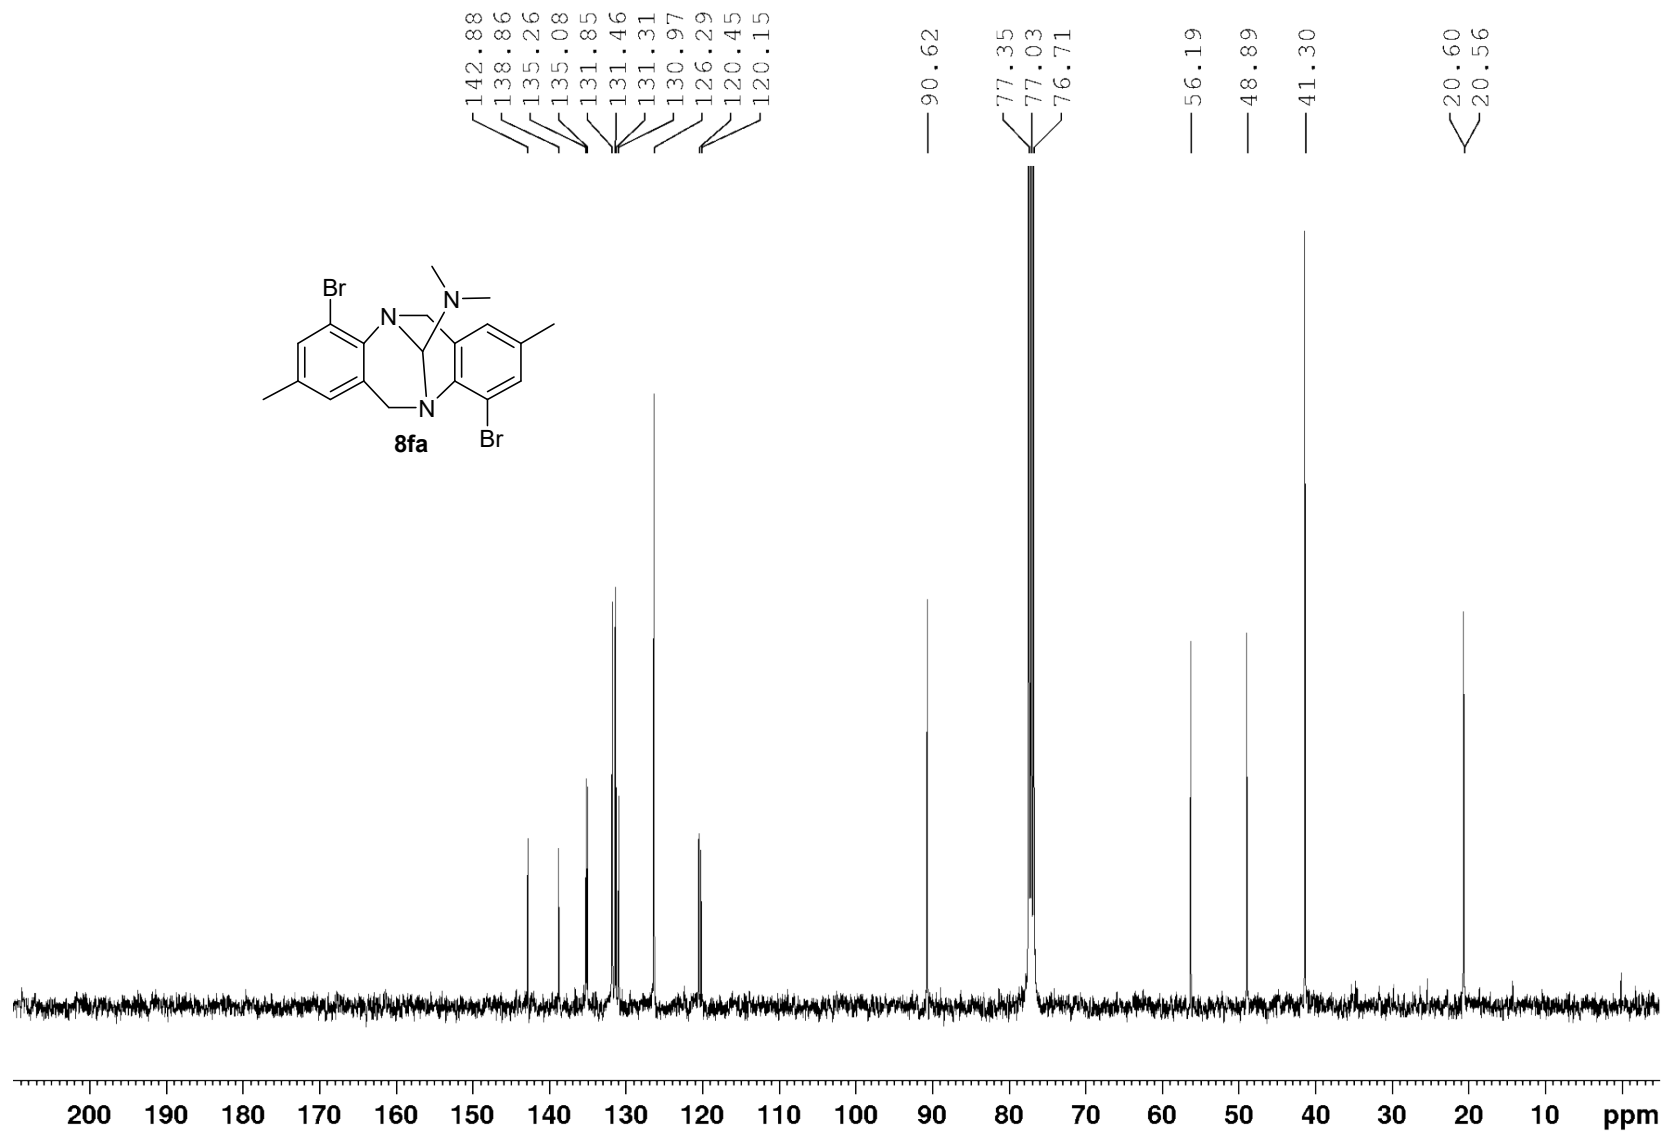

### 3. Single Crystal X-ray Analytical Data

Crystals suitable for X-ray analyses were obtained by a slow evaporation method using ethyl acetate as a solvent system. X-ray reflections were collected using Cu K $\alpha$  X-radiation ( $\lambda = 1.54184$  Å) on a single crystal at 293 (2) K using an Xcalibur, Eos, Gemini diffractometer. All the crystal structures were solved and refined using SHELX-2014. The details of crystal data collections and data refinement parameters are given in Table S1.

**ORTEP (ellipsoid counter 25% probability) diagram and crystal data of compound 4: CCDC Number 2529718**

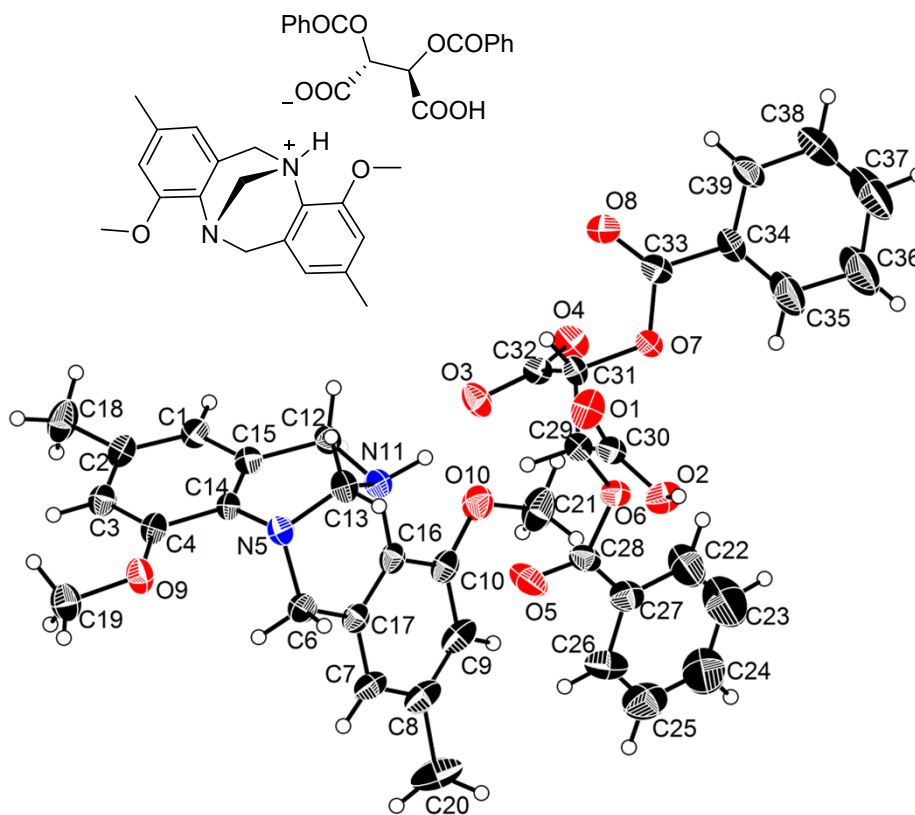

Packing diagram of diastereomeric salt **4** [(-)-DBTA•(+)-**2d**], indicates the O-H···O and N-H···O hydrogen bonding interactions.

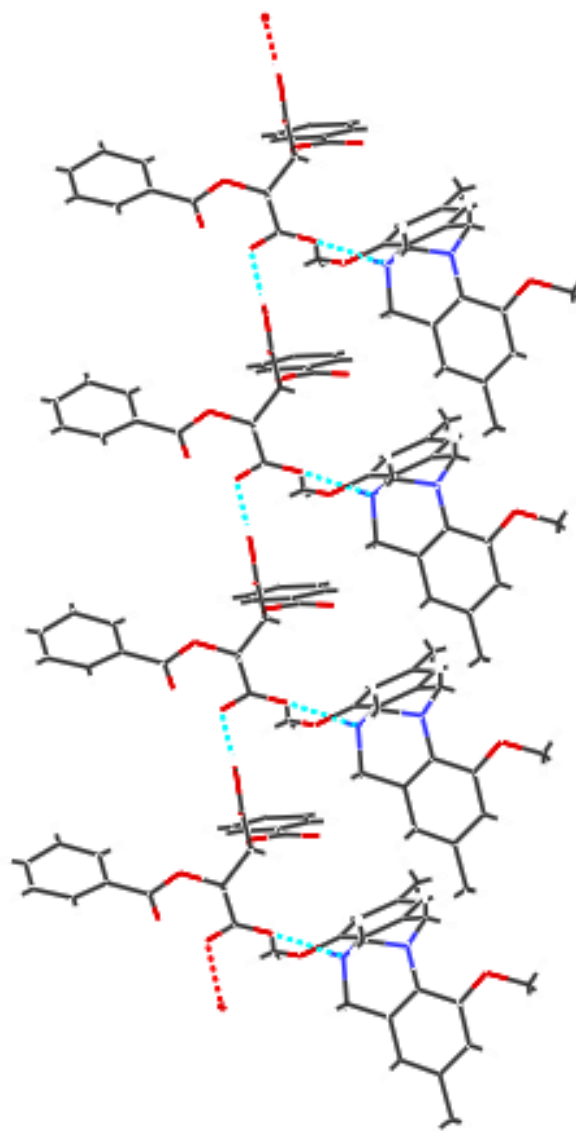

Structure **4** (CCDC 2529718):  $C_{37}H_{36}N_2O_{10}$

PROBLEM: <Deprecated .res/.hkl Input Style SQUEEZE Job ...! Note. >

RESPONSE: <Due to the crystals had large voids with badly disordered solvent molecules. The crystallographic refinement was completed with the solvent contribution subtracted from the data using SQUEEZE from the PLATON package of crystallographic software. Although attempts were made to solve this problem using different solvent systems, the problem couldn't be solved.>

Table S1. Crystal data and structure refinement for **4**.

|                                   |                                                                |          |
|-----------------------------------|----------------------------------------------------------------|----------|
| Identification code               | shelx                                                          |          |
| Empirical formula                 | C <sub>37</sub> H <sub>36</sub> N <sub>2</sub> O <sub>10</sub> |          |
| Formula weight                    | 668.68                                                         |          |
| Temperature                       | 293(2) K                                                       |          |
| Wavelength                        | 1.54184 Å                                                      |          |
| Crystal system                    | Orthorhombic                                                   |          |
| Space group                       | P 21 21 2                                                      |          |
| Unit cell dimensions              | a = 23.8296(9) Å                                               | α = 90°. |
|                                   | b = 21.2588(9) Å                                               | β = 90°. |
|                                   | c = 7.8763(3) Å                                                | γ = 90°. |
| Volume                            | 3990.0(3) Å <sup>3</sup>                                       |          |
| Z                                 | 4                                                              |          |
| Density (calculated)              | 1.113 Mg/m <sup>3</sup>                                        |          |
| Absorption coefficient            | 0.675 mm <sup>-1</sup>                                         |          |
| F(000)                            | 1408                                                           |          |
| Crystal size                      | 0.18 x 0.20 x 0.24 mm <sup>3</sup>                             |          |
| Theta range for data collection   | 2.785 to 71.739°.                                              |          |
| Index ranges                      | -29 ≤ h ≤ 28, -26 ≤ k ≤ 24, -9 ≤ l ≤ 7                         |          |
| Reflections collected             | 9407                                                           |          |
| Independent reflections           | 6283 [R(int) = 0.0785]                                         |          |
| Completeness to theta = 67.684°   | 99.9 %                                                         |          |
| Refinement method                 | Full-matrix least-squares on F <sup>2</sup>                    |          |
| Data/restraints/parameters        | 6283 / 0 / 446                                                 |          |
| Goodness-of-fit on F <sup>2</sup> | 0.907                                                          |          |
| Final R indices [I > 2σ(I)]       | R1 = 0.0699, wR2 = 0.1709                                      |          |
| R indices (all data)              | R1 = 0.0985, wR2 = 0.1942                                      |          |
| Absolute structure parameter      | -0.2(4)                                                        |          |
| Extinction coefficient            | n/a                                                            |          |
| Largest diff. peak and hole       | 0.213 and -0.218 e.Å <sup>-3</sup>                             |          |
